# Supplementary material for: Less-invasive age estimation using hair based on DNA methylation in brown bears
Source: Research Square preprint supplement (doi:10.21203/rs.3.rs-7042508/v1), 2025-08-04
Supplement: Supplementary file 1 [file 757195db181d32396a355bdc.pdf]

**Supplemental Information for:**

**Less-invasive age estimation using hair based on DNA methylation  
in brown bears**

Shiori Nakamura, Jumpei Yamazaki, Naoya Matsumoto, Kyougo Hagino, Hideyuki Sakamoto,  
Masami Yamanaka, Masanao Nakanishi, Mina Jimbo, Yojiro Yanagawa, Hideyuki Ito,  
Toshio Tsubota, Michito Shimozuru

**Table of Contents:**

|                                     |                |
|-------------------------------------|----------------|
| <b>Supplementary Table S_M1</b>     | <b>Page 3</b>  |
| <b>Supplementary Table S_R1</b>     | <b>Page 5</b>  |
| <b>Supplementary Table S_R2</b>     | <b>Page 6</b>  |
| <b>Supplementary Figure S_R1_1</b>  | <b>Page 7</b>  |
| <b>Supplementary Figure S_R1_2</b>  | <b>Page 8</b>  |
| <b>Supplementary Figure S_R1_3</b>  | <b>Page 9</b>  |
| <b>Supplementary Figure S_R1_4.</b> | <b>Page 10</b> |
| <b>Supplementary Figure S_R1_5</b>  | <b>Page 11</b> |
| <b>Supplementary Figure S_R1_6</b>  | <b>Page 12</b> |
| <b>Supplementary Figure S_R1_7</b>  | <b>Page 13</b> |
| <b>Supplementary Figure S_R1_8</b>  | <b>Page 14</b> |
| <b>Supplementary Figure S_R1_9</b>  | <b>Page 15</b> |
| <b>Supplementary Figure S_R1_10</b> | <b>Page 16</b> |
| <b>Supplementary Figure S_R1_11</b> | <b>Page 17</b> |
| <b>Supplementary Figure S_R2_1</b>  | <b>Page 18</b> |
| <b>Supplementary Figure S_R2_2</b>  | <b>Page 19</b> |
| <b>Supplementary Figure S_R2_3</b>  | <b>Page 20</b> |
| <b>Supplementary Figure S_R3_1</b>  | <b>Page 21</b> |
| <b>Supplementary Figure S_R3_2</b>  | <b>Page 22</b> |
| <b>Supplementary Figure S_R3_3</b>  | <b>Page 23</b> |
| <b>Supplementary Figure S_R3_4</b>  | <b>Page 24</b> |

|                                     |         |
|-------------------------------------|---------|
| <b>Supplementary Figure S_R3_5</b>  | Page 25 |
| <b>Supplementary Figure S_R3_6</b>  | Page 26 |
| <b>Supplementary Figure S_R3_7</b>  | Page 27 |
| <b>Supplementary Figure S_R3_8</b>  | Page 28 |
| <b>Supplementary Figure S_R3_9</b>  | Page 29 |
| <b>Supplementary Figure S_R3_10</b> | Page 30 |
| <b>Supplementary Figure S_R3_11</b> | Page 31 |

Supplementary Table S\_M1. List of hair samples used in this study.

| <b>Captive/Wild</b> | <b>Bear ID</b> | <b>Sex</b> | <b>Birth year</b> | <b>Sampling date</b> | <b>Age at sampling (year)</b> |
|---------------------|----------------|------------|-------------------|----------------------|-------------------------------|
| C                   | Nonno          | F          | 2022              | 2023/12/11           | 1.9                           |
| C                   | Ikorō          | M          | 2022              | 2024/2/29            | 2.1                           |
| C                   | Shouhei        | M          | 2018              | 2020/7/19            | 2.5                           |
| C                   | Daichi         | M          | 2017              | 2020/11/1            | 3.7                           |
| C                   | Kutta          | M          | 2016              | 2020/6/3             | 4.3                           |
| C                   | Kai            | M          | 2016              | 2020/6/3             | 4.3                           |
| C                   | Haru           | F          | 2019              | 2023/11/29           | 4.8                           |
| C                   | Tocky          | M          | 2018              | 2023/5/12            | 5.3                           |
| C                   | Ana            | F          | 2015              | 2020/6/4             | 5.3                           |
| C                   | Fuku           | M          | 2015              | 2020/6/23            | 5.4                           |
| C                   | Lucky          | F          | 2015              | 2021/4/27            | 6.2                           |
| C                   | Kotetsu        | M          | 2017              | 2023/5/19            | 6.3                           |
| C                   | Honoka         | F          | 2015              | 2021/6/9             | 6.4                           |
| C                   | Sasuke         | M          | 2015              | 2021/6/22            | 6.4                           |
| C                   | Yuzuru         | M          | 2014              | 2020/7/19            | 6.5                           |
| C                   | Maron          | F          | 2013              | 2020/6/4             | 7.3                           |
| C                   | Marin          | F          | 2013              | 2021/3/22            | 8.1                           |
| C                   | Tsurara        | M          | 2013              | 2021/5/7             | 8.3                           |
| C                   | Syosuke        | M          | 2013              | 2021/5/20            | 8.3                           |
| C                   | Meruru         | M          | 2013              | 2021/6/18            | 8.4                           |
| C                   | Ren            | M          | 2011              | 2020/6/23            | 9.4                           |
| C                   | Rocky          | M          | 2010              | 2020/6/25            | 10.4                          |
| C                   | Tokuto         | M          | 2010              | 2020/6/25            | 10.4                          |
| C                   | Sumiri         | F          | 2006              | 2020/12/24           | 14.9                          |
| C                   | Kanta          | M          | 2006              | 2021/6/7             | 15.3                          |
| C                   | Mantarou       | M          | 2006              | 2021/6/7             | 15.3                          |
| C                   | Bekky          | F          | 2002              | 2019/4/23            | 17.2                          |
| C                   | Moriko         | F          | 2001              | 2020/11/11           | 19.8                          |
| C                   | Momoko         | F          | 1999              | 2019/4/24            | 20.2                          |
| C                   | Koron          | F          | 1999              | 2019/4/24            | 20.2                          |
| C                   | Erika          | F          | 1999              | 2019/12/6            | 20.8                          |
| C                   | Torue          | F          | 1999              | 2023/12/8            | 24.8                          |

|   |        |   |      |           |      |
|---|--------|---|------|-----------|------|
| C | Masako | F | 1992 | 2021/5/4  | 29.3 |
| C | Kiko   | F | 1990 | 2021/4/27 | 31.2 |
| C | Raisa  | F | 1991 | 2024/3/21 | 33.1 |
| W | Button | F | 2018 | 2022/6/2  | 4.3  |
| W | Lucky  | F | 2019 | 2024/6/3  | 5.3  |
| W | Crayon | F | 2015 | 2022/8/24 | 7.6  |
| W | Betty  | F | 2014 | 2022/8/23 | 8.6  |
| W | Ein    | F | 2014 | 2023/8/22 | 9.6  |
| W | Guri   | F | 2010 | 2022/8/22 | 12.6 |
| W | Hatch  | F | 2007 | 2021/6/24 | 14.4 |
| W | Drum   | F | 2004 | 2019/7/5  | 15.4 |
| W | Wacky  | F | 2002 | 2020/8/29 | 18.6 |
| W | Rich   | F | 2002 | 2021/8/18 | 19.5 |
| W | Kiriko | F | 2001 | 2024/6/4  | 23.3 |
| W | Linda  | F | 1996 | 2023/8/22 | 27.6 |

C: captive; W: wild; M: male; F: female

Supplementary Table S\_R1. Correlation between DNA methylation level and chronological age. This table includes correlation coefficients (cor) and *p*-values for each CpG sites.

| <b>CpG site</b> | <b>cor</b> | <b><i>p</i>-value</b> |
|-----------------|------------|-----------------------|
| VGf-1           | 0.682      | < 0.0001              |
| VGf-2           | 0.726      | < 0.0001              |
| VGf-3           | 0.784      | < 0.0001              |
| KCNK12-1        | 0.755      | < 0.0001              |
| KCNK12-2        | 0.706      | < 0.0001              |
| KCNK12-3        | 0.810      | < 0.0001              |
| ELOVL2-1        | 0.371      | <0.05                 |
| ELOVL2-2        | 0.458      | <0.01                 |
| ELOVL2-3        | 0.518      | <0.001                |

Supplementary Table S\_R2. Optimized parameters for the elastic net regression and the SVR models.

| Model                            | Used CpGs                                            | Alpha | Lambda    | Cost      | Gamma       | Epsilon |
|----------------------------------|------------------------------------------------------|-------|-----------|-----------|-------------|---------|
| <b>Elastic net regression</b>    | All (9 CpGs)                                         | 0.04  | 0.4369317 |           |             |         |
| <b>Support vector regression</b> | all (9 CpGs)                                         |       |           | 3.981072  | 0.005011872 | 0.1     |
|                                  | VGf-1, -2, -3,<br>KCNK12-1, -2, -3,<br>ELOVL2 -2, -3 |       |           | 5.011872  | 0.003981072 | 0.1     |
|                                  | VGf-1, -2, -3,<br>KCNK12-1, -2, -3,<br>ELOVL2 -3     |       |           | 39.81072  | 0.05011872  | 0.1     |
|                                  | VGf-1, -3,<br>KCNK12-1, -2, -3,<br>ELOVL2 -3         |       |           | 1.258925  | 0.01258925  | 0.1     |
|                                  | VGf-1, -3,<br>KCNK12-2, -3,<br>ELOVL2 -3             |       |           | 1.258925  | 0.01584893  | 0.1     |
|                                  | VGf-1, -3,<br>KCNK12-2, -3                           |       |           | 1.995262  | 0.01584893  | 0.1     |
|                                  | VGf-1, -3,<br>KCNK12-3                               |       |           | 50.11872  | 0.006309573 | 0.1     |
|                                  | VGf-3,<br>KCNK12-3                                   |       |           | 0.7943282 | 0.03162278  | 0.1     |
|                                  | VGf-1, -2, -3                                        |       |           | 79.43282  | 0.07943282  | 0.1     |
|                                  | KCNK12-1, -2, -3                                     |       |           | 1.258925  | 0.03162278  | 0.1     |

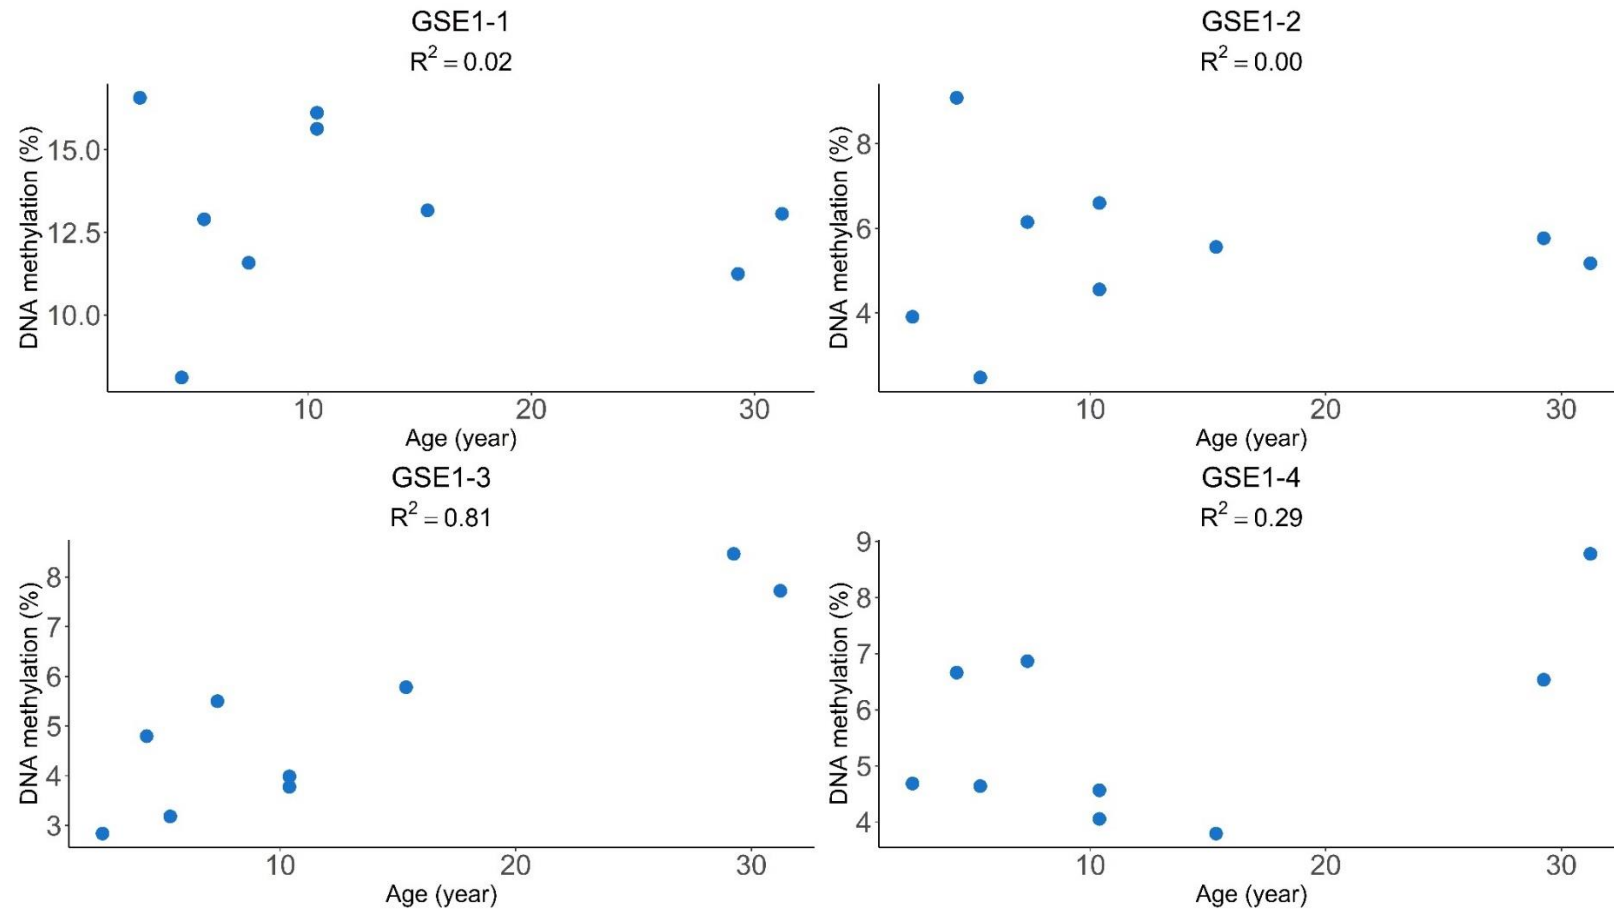

Supplementary Figure S\_R1\_1. Scatter plots of chronological age (year) versus DNA methylation level (%) at the CpG sites adjacent to *GSE1* used for the screening process.

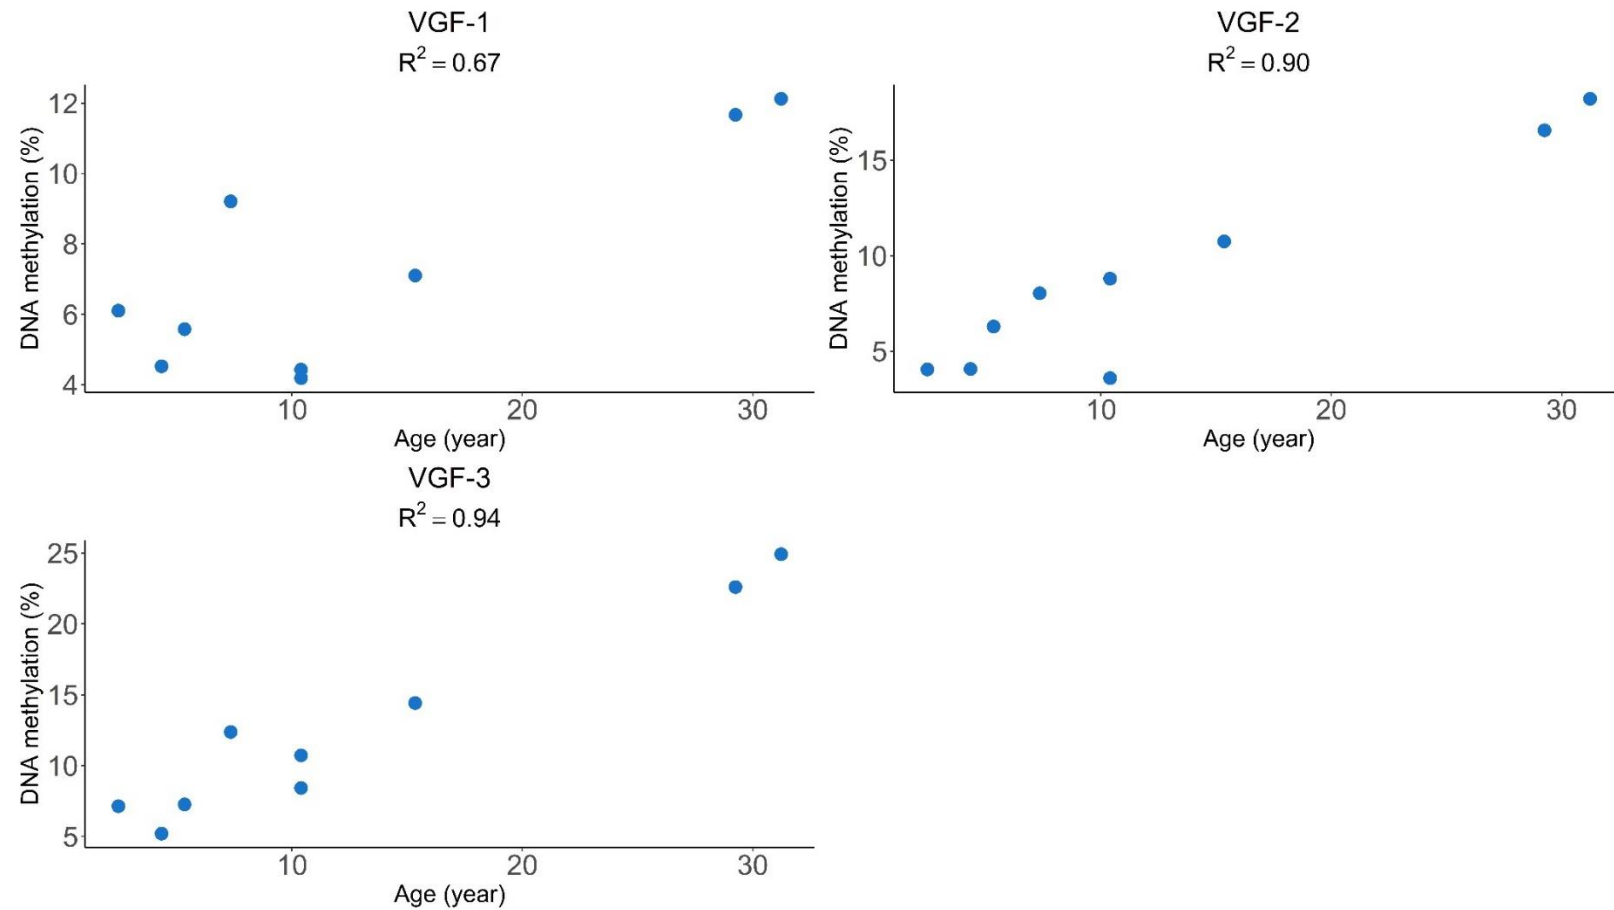

Supplementary Figure S\_R1\_2. Scatter plots of chronological age (year) versus DNA methylation level (%) at the CpG sites adjacent to *VGF* used for the screening process.



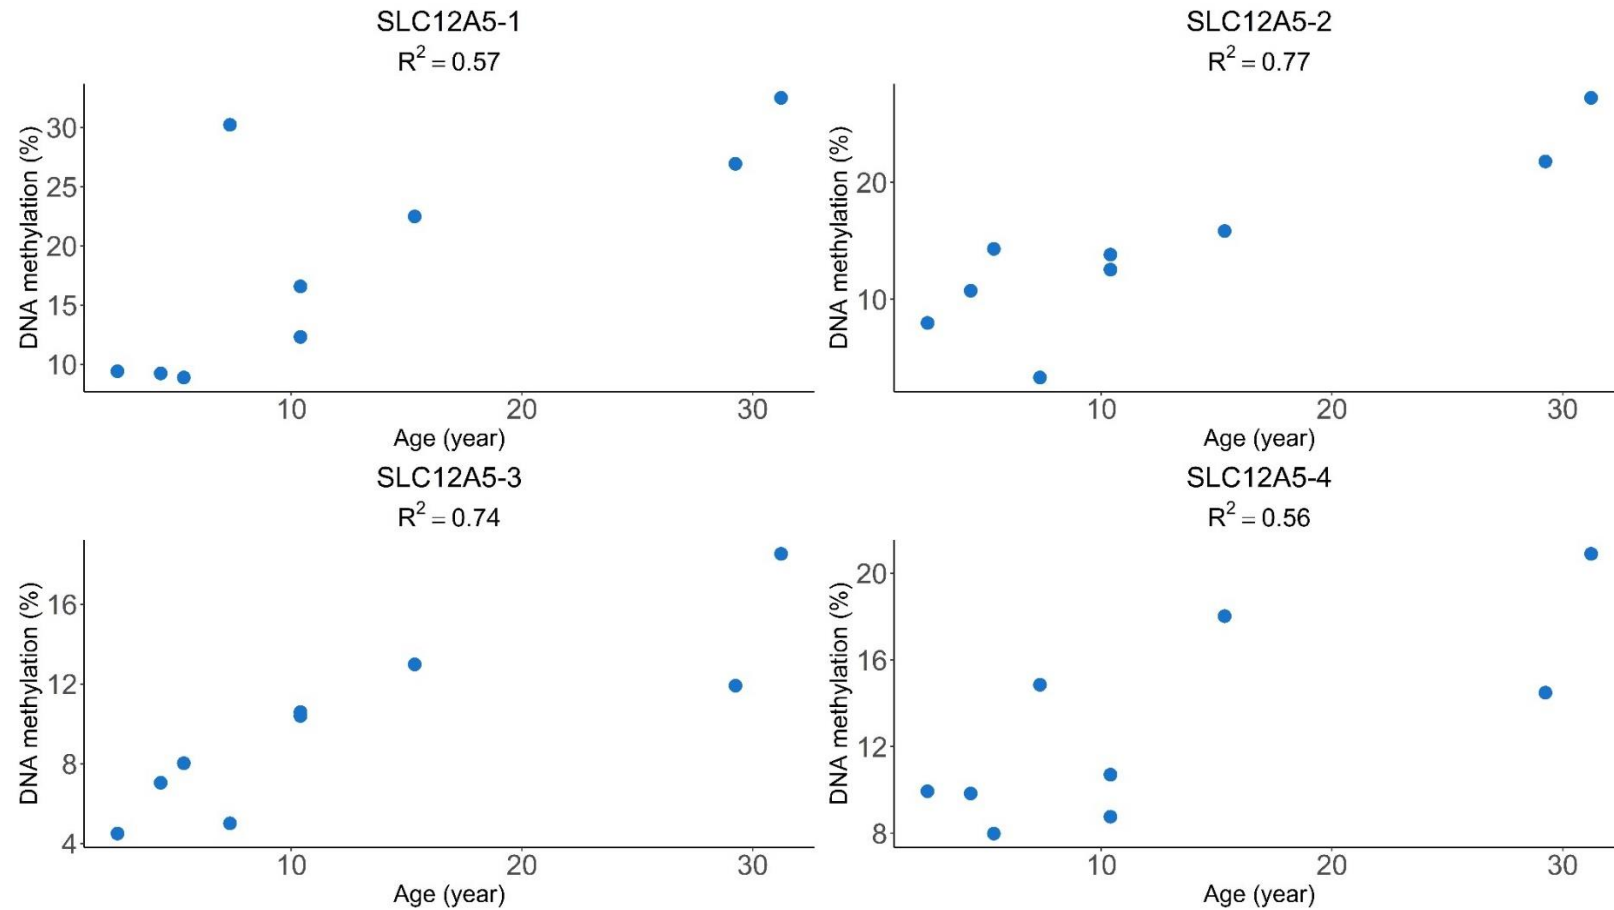

Supplementary Figure S\_R1\_3. Scatter plots of chronological age (year) versus DNA methylation level (%) at the CpG sites adjacent to *SLC12A5* used for the screening process.

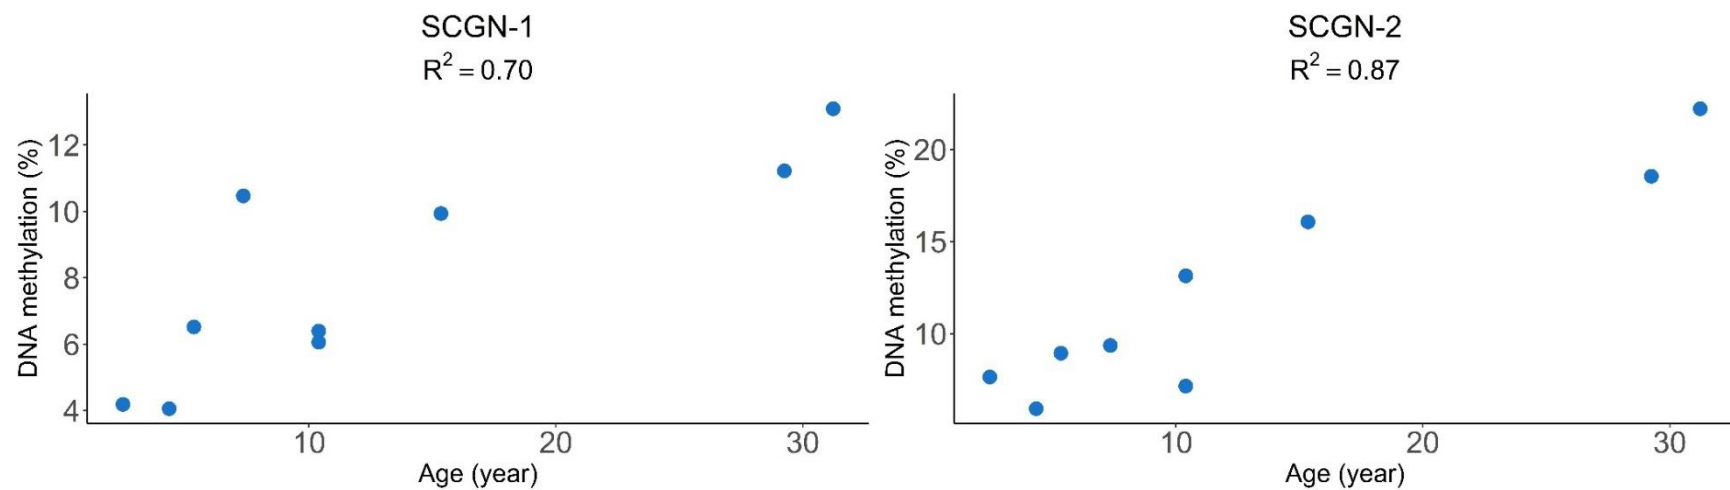

Supplementary Figure S\_R1\_4. Scatter plots of chronological age (year) versus DNA methylation level (%) at the CpG sites adjacent to *SCGN* used for the screening process.

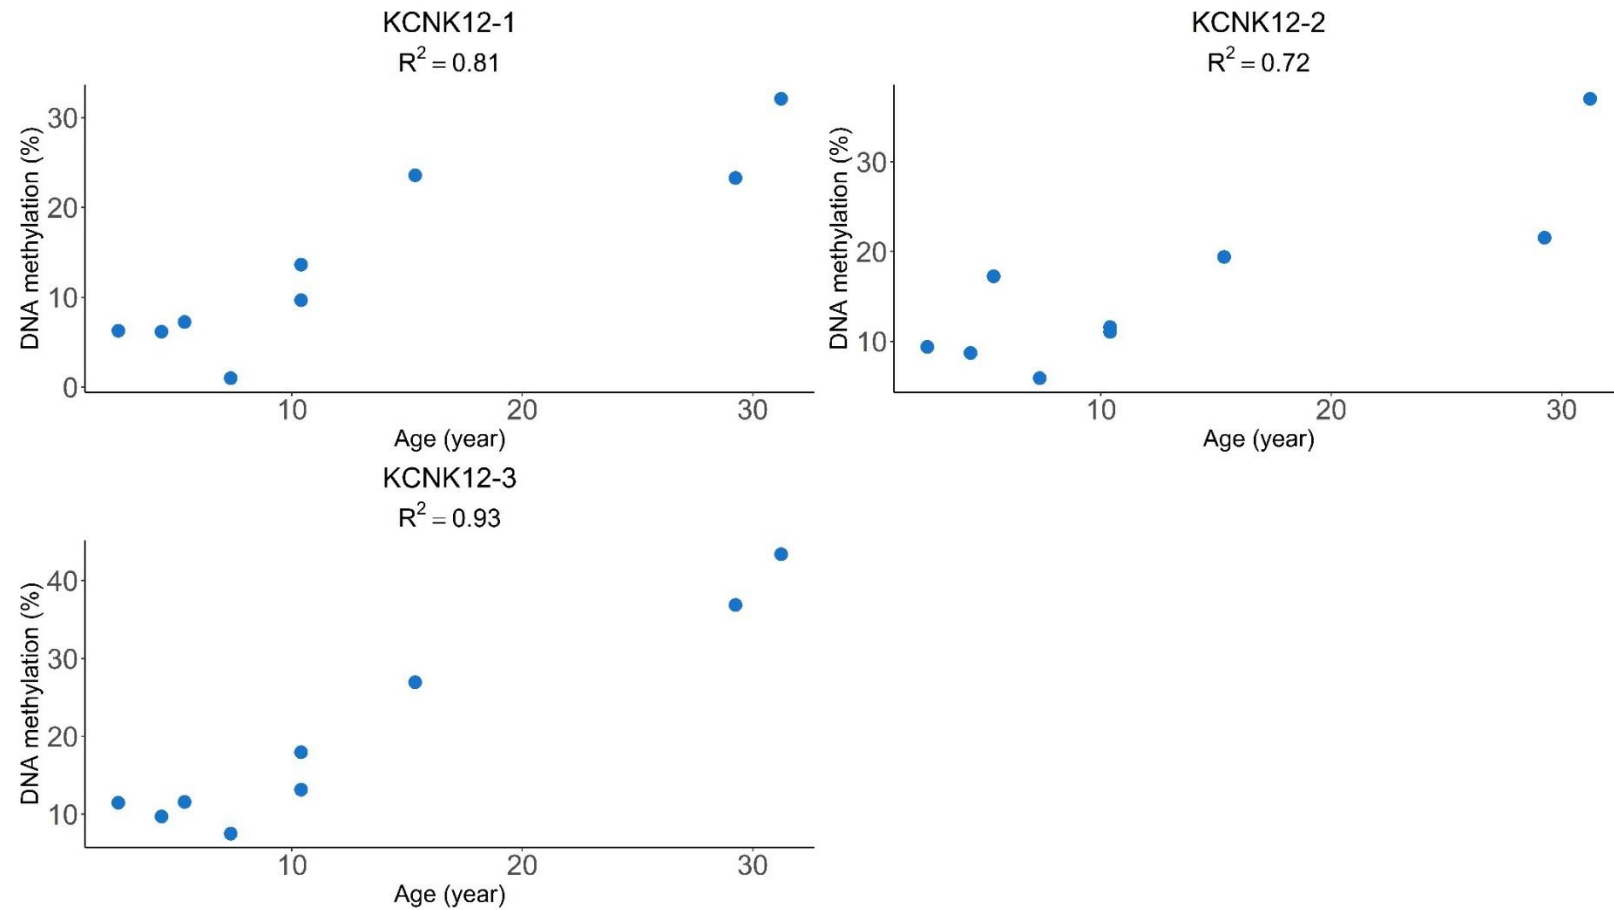

Supplementary Figure S\_R1\_5. Scatter plots of chronological age (year) versus DNA methylation level (%) at the CpG sites adjacent to *KCNK12* used for the screening process.

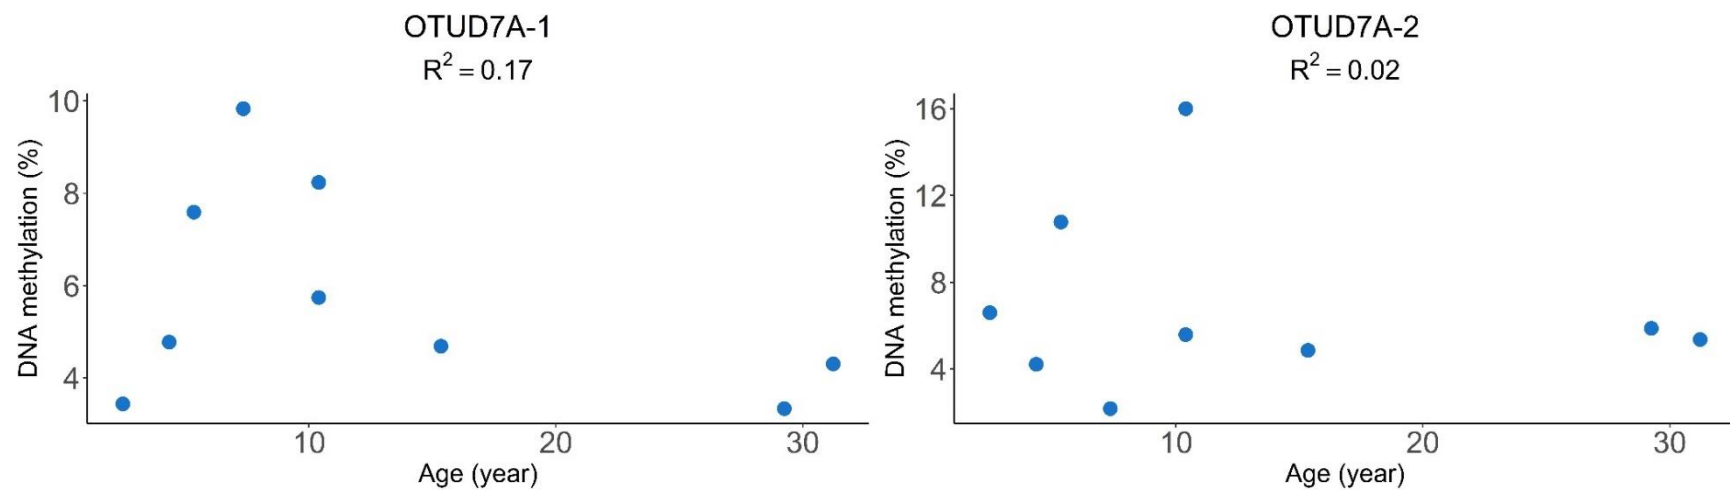

Supplementary Figure S\_R1\_6. Scatter plots of chronological age (year) versus DNA methylation level (%) at the CpG sites adjacent to *OTUD7A* used for the screening process.

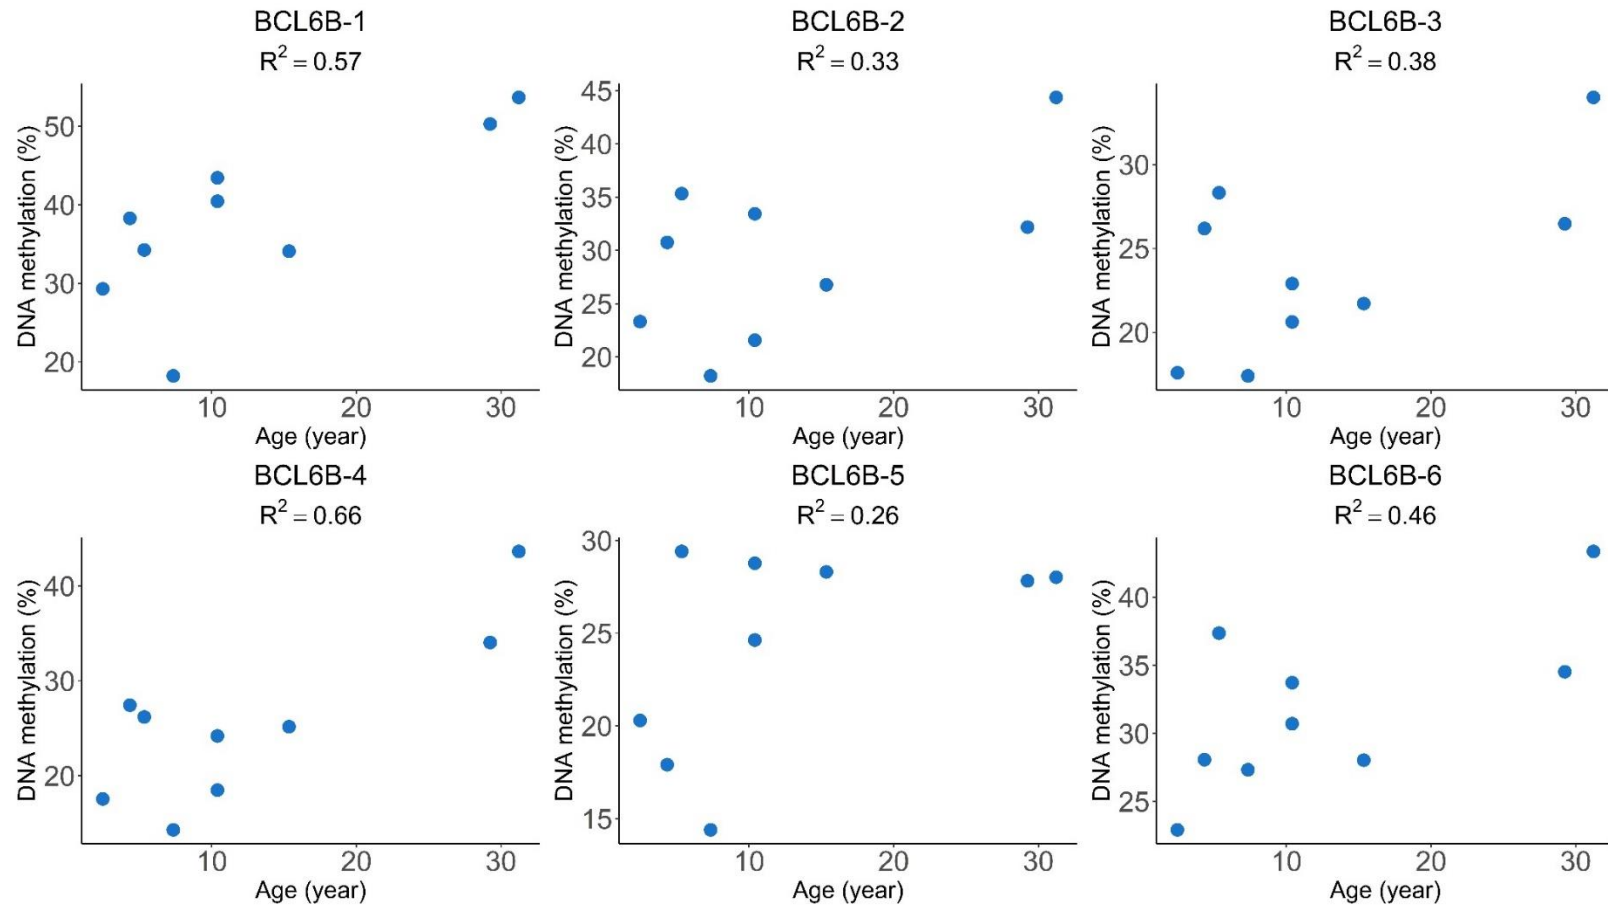

Supplementary Figure S\_R1\_7. Scatter plots of chronological age (year) versus DNA methylation level (%) at the CpG sites adjacent to *BCL6B* used for the screening process.

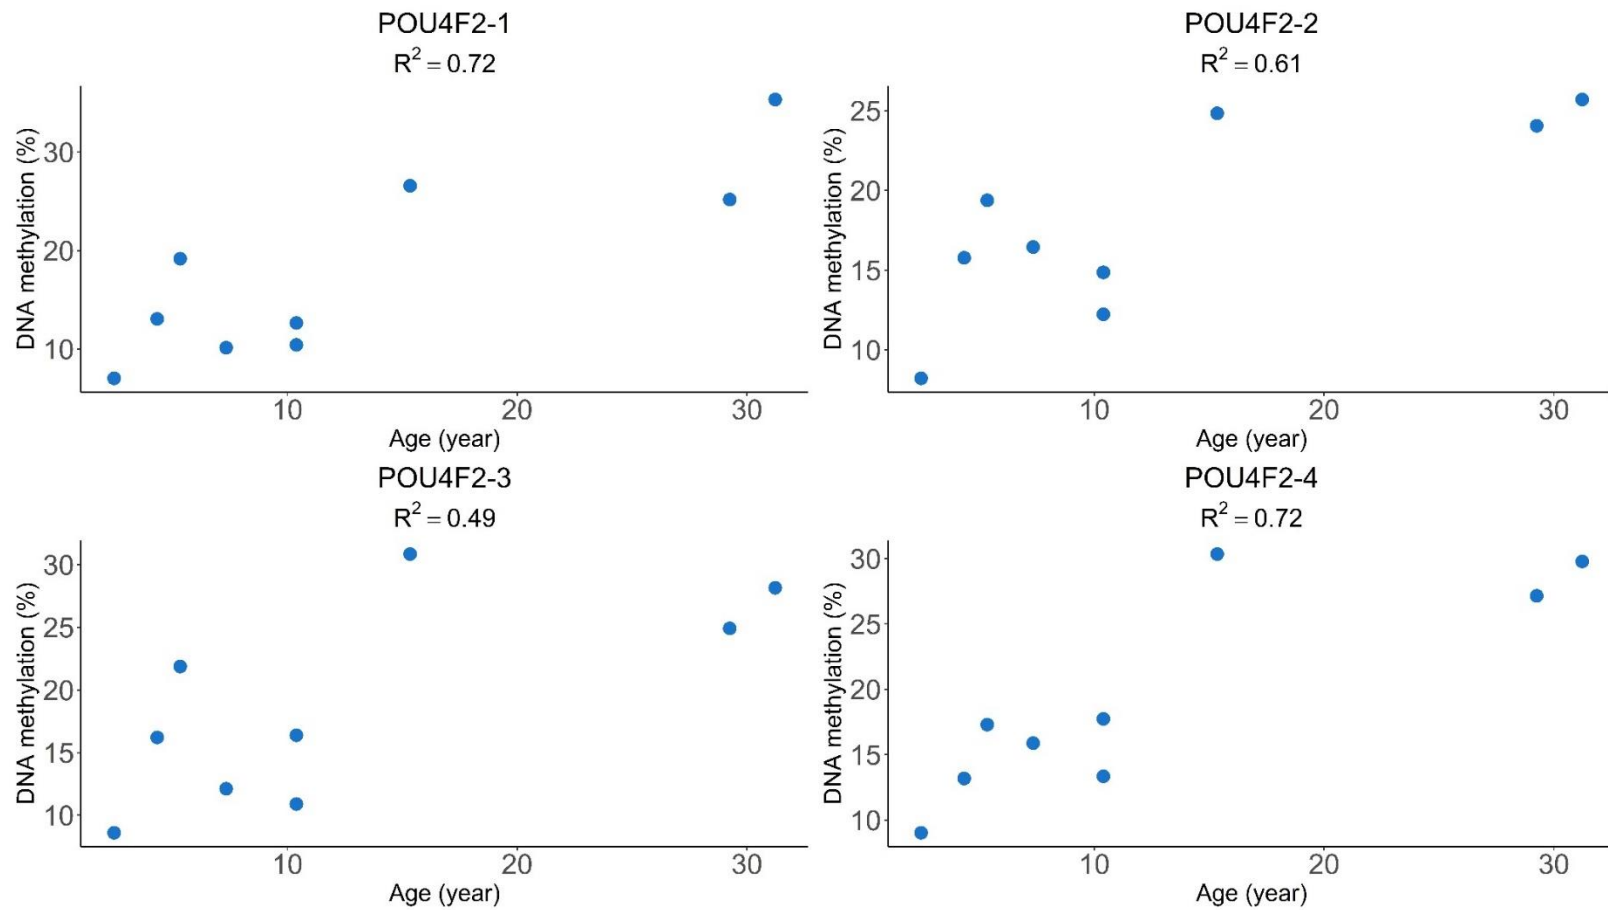

Supplementary Figure S\_R1\_8. Scatter plots of chronological age (year) versus DNA methylation level (%) at the CpG sites adjacent to *POU4F2* used for the screening process.

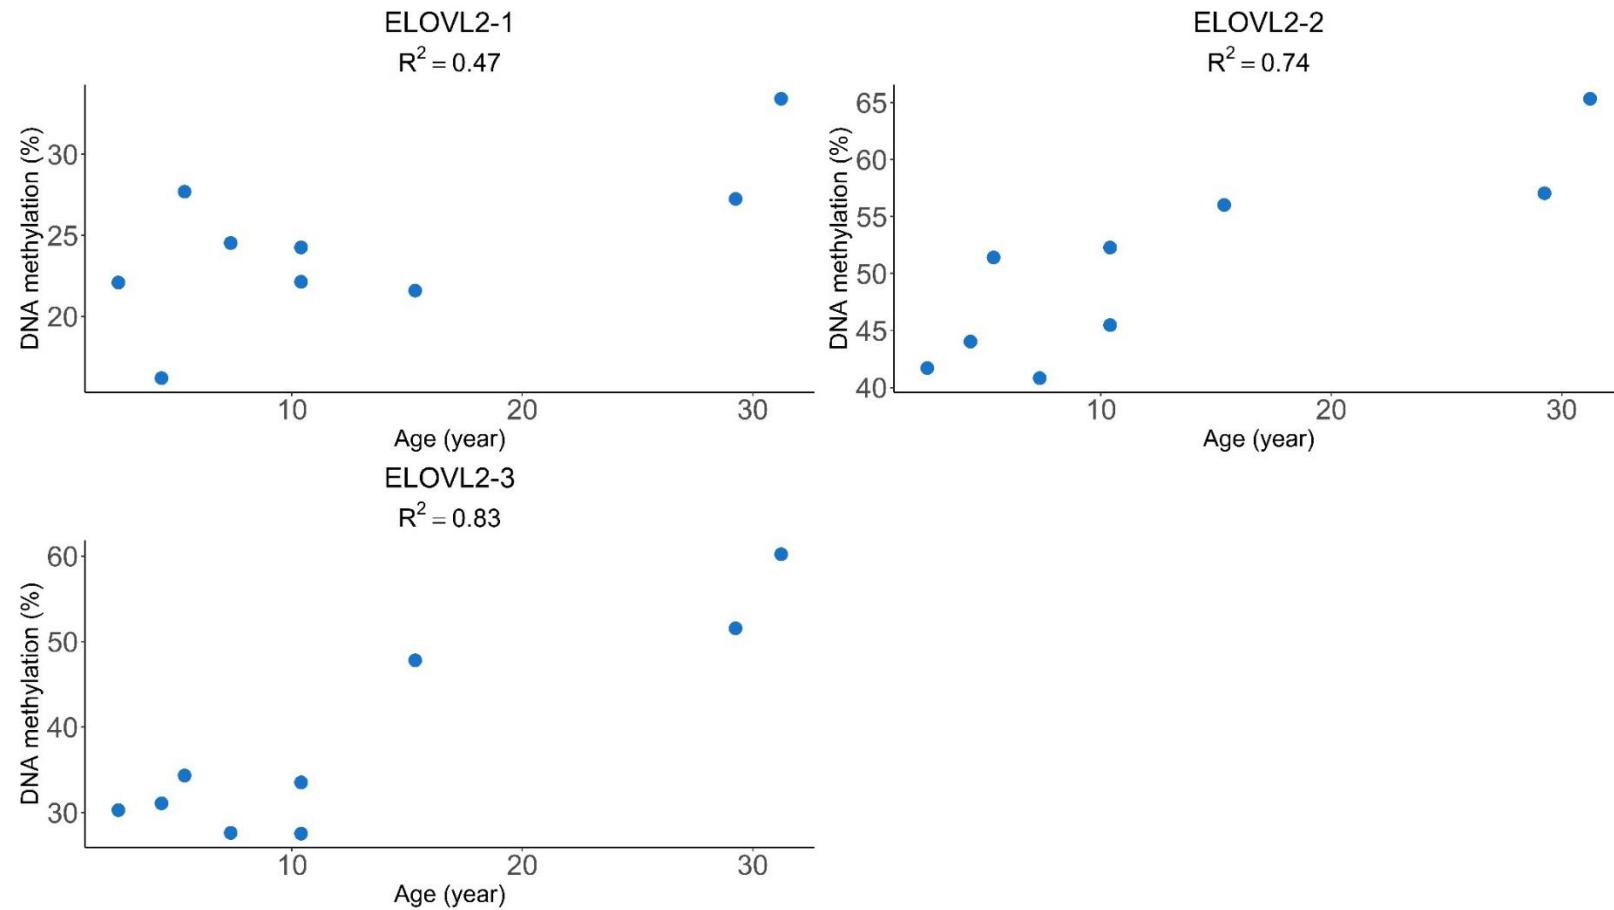

Supplementary Figure S\_R1\_9. Scatter plots of chronological age (year) versus DNA methylation level (%) at the CpG sites adjacent to *ELOVL2* used for the screening process.

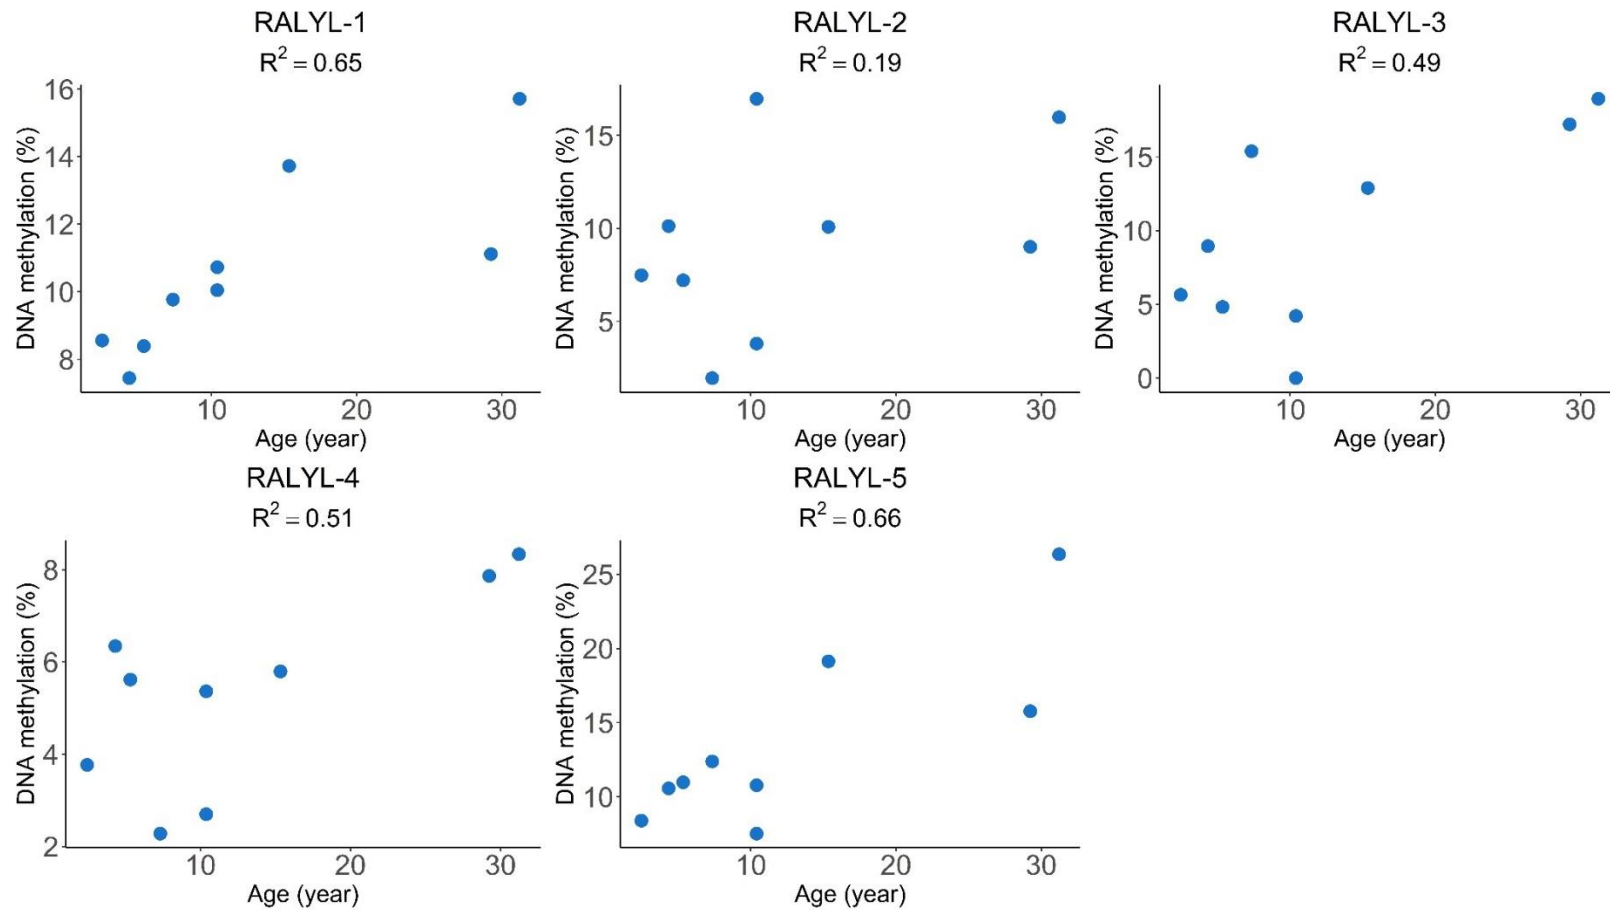

Supplementary Figure S\_R1\_10. Scatter plots of chronological age (year) versus DNA methylation level (%) at the CpG sites adjacent to *RALYL* used for the screening process.



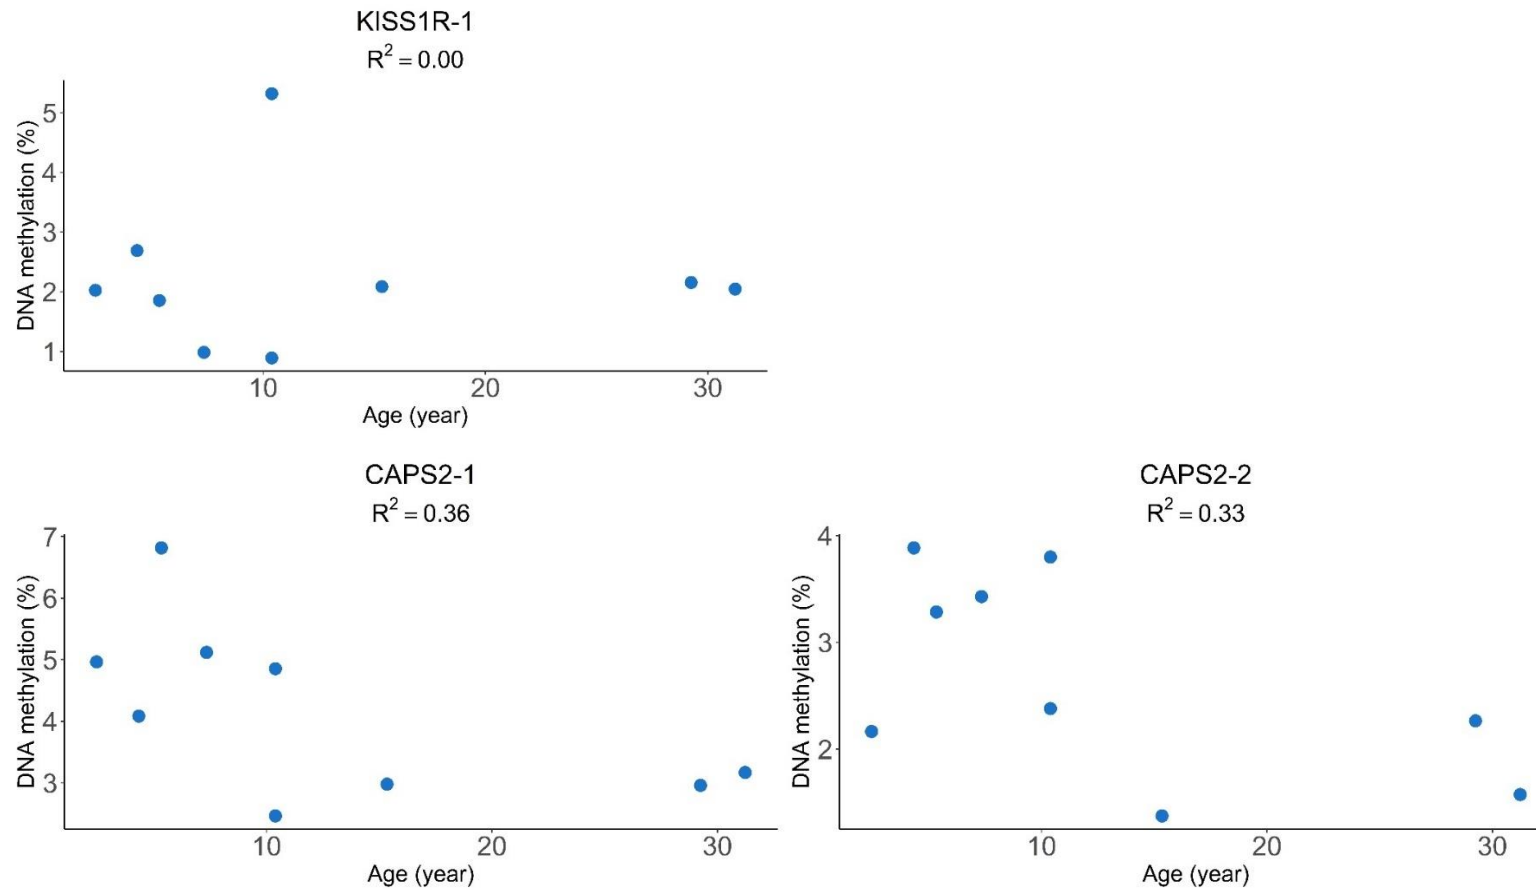

Supplementary Figure S\_R1\_11. Scatter plots of chronological age (year) versus DNA methylation level (%) at the CpG sites adjacent to *KISS1R* and *CAPS2* used for the screening process.

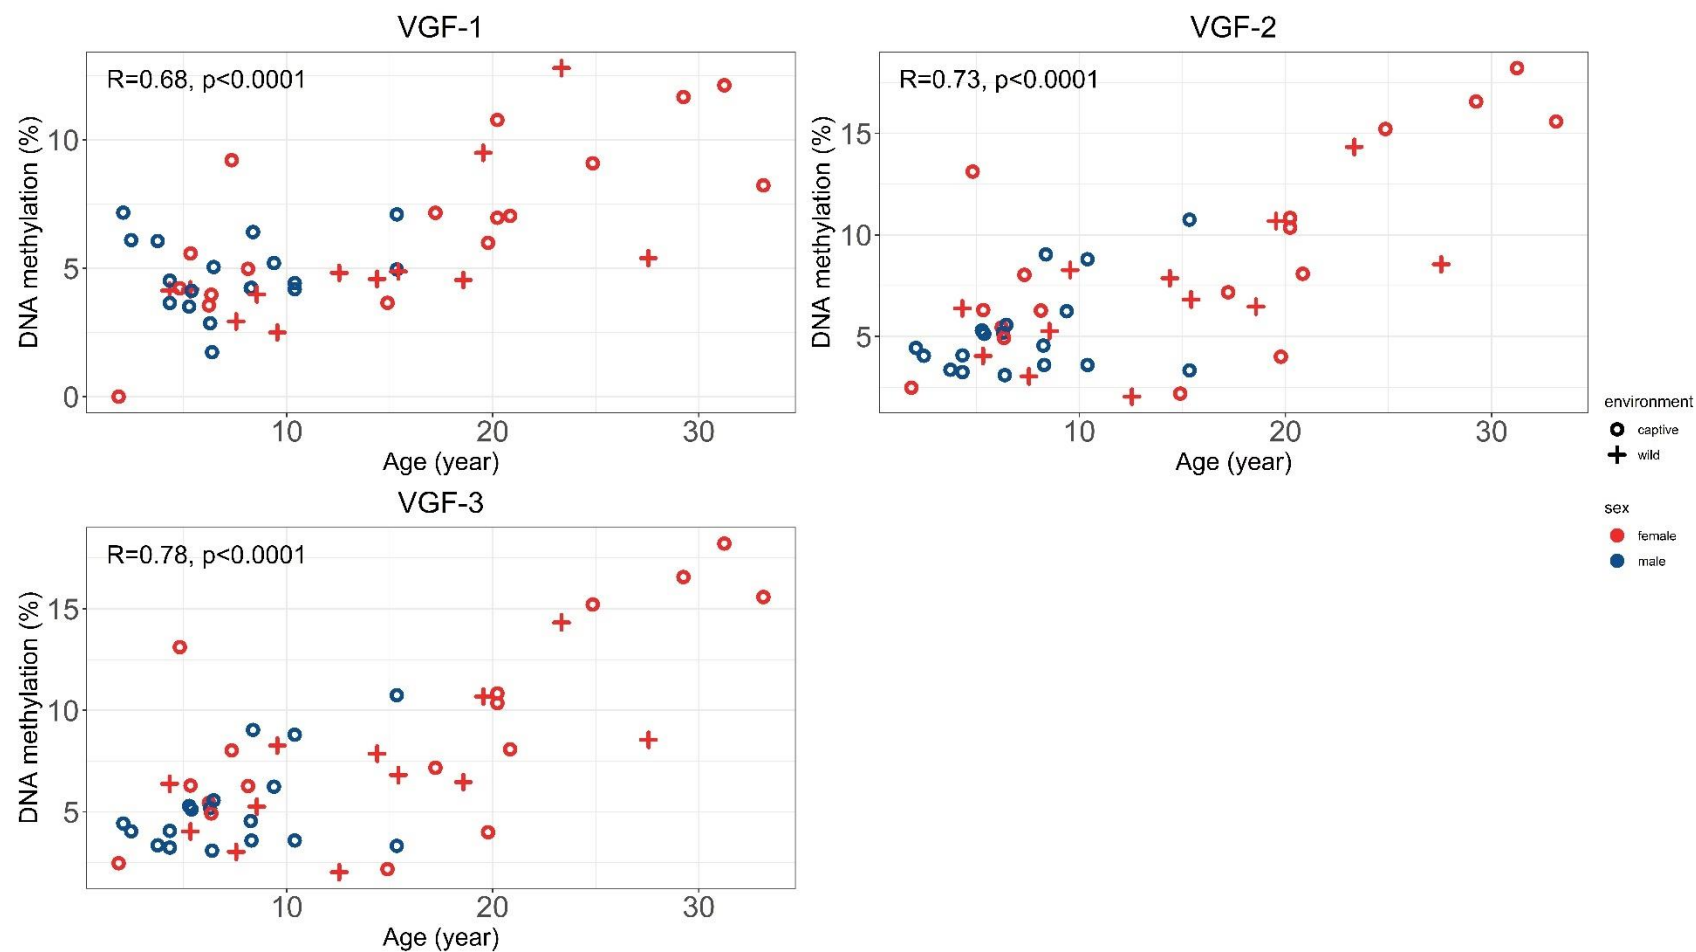

Supplementary Figure S\_R2\_1. Scatter plots of chronological age (year) versus DNA methylation level (%) at the CpG sites. This figure shows the CpGs adjacent to *VGF*.

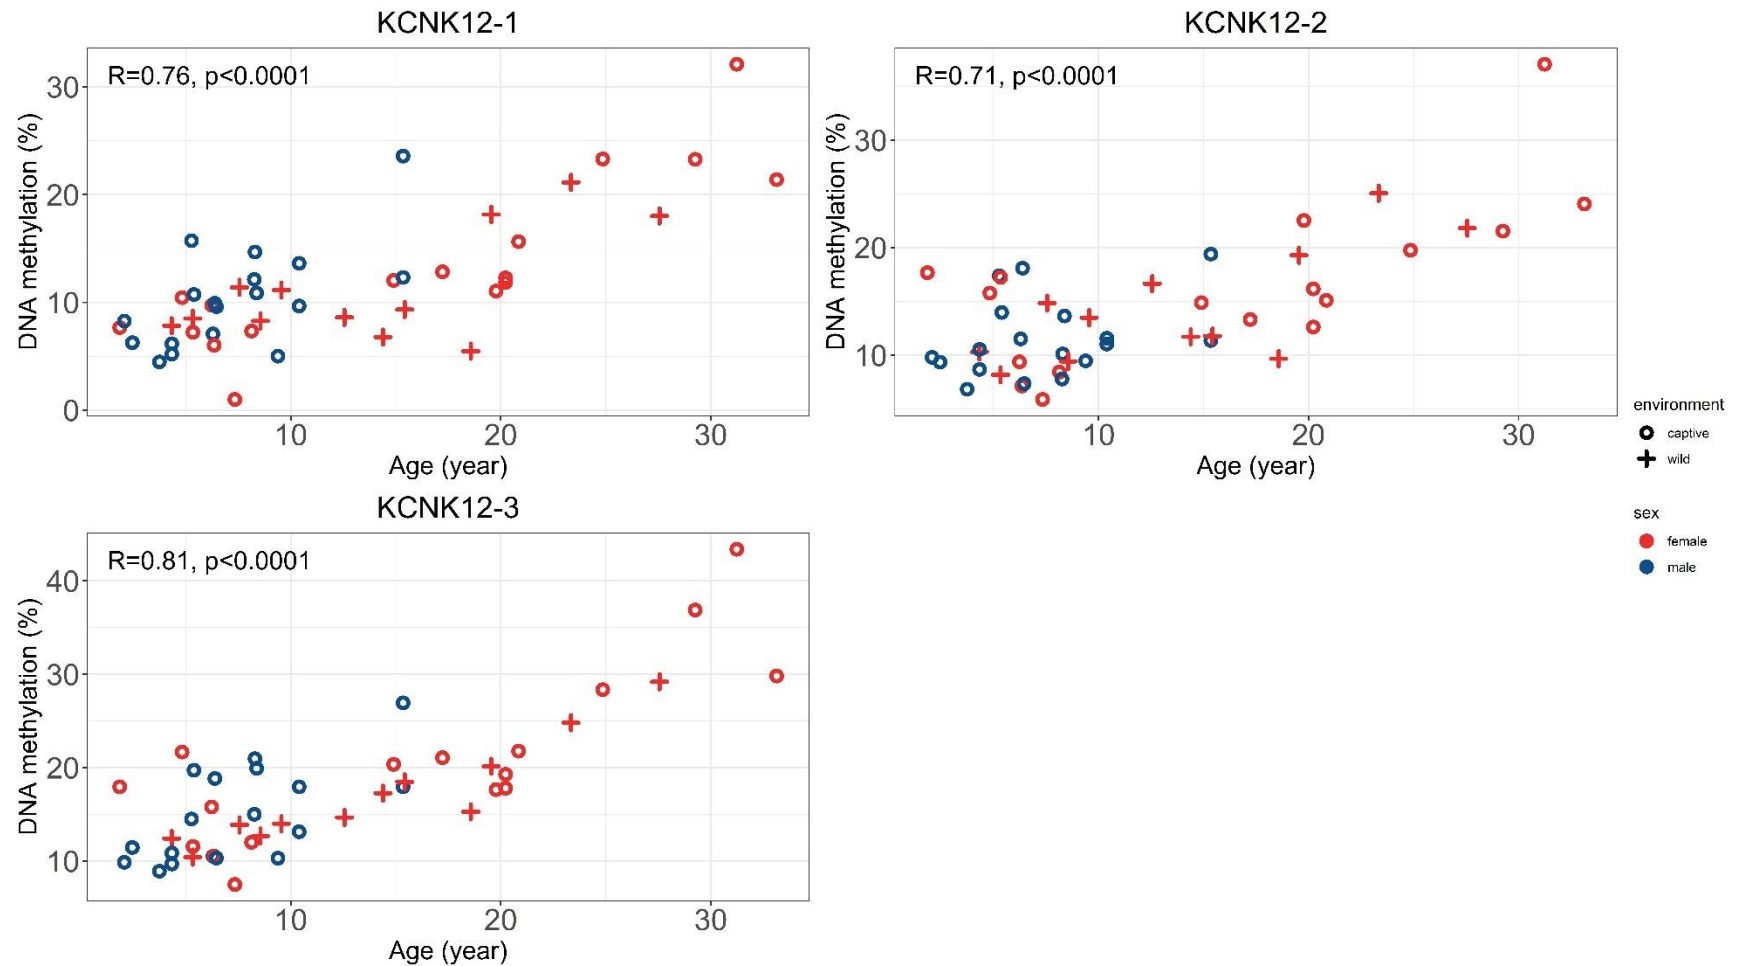

Supplementary Figure S\_R2\_2. Scatter plots of chronological age (year) versus DNA methylation level (%) at the CpG sites. This figure shows the CpGs adjacent to *KCNK12*.

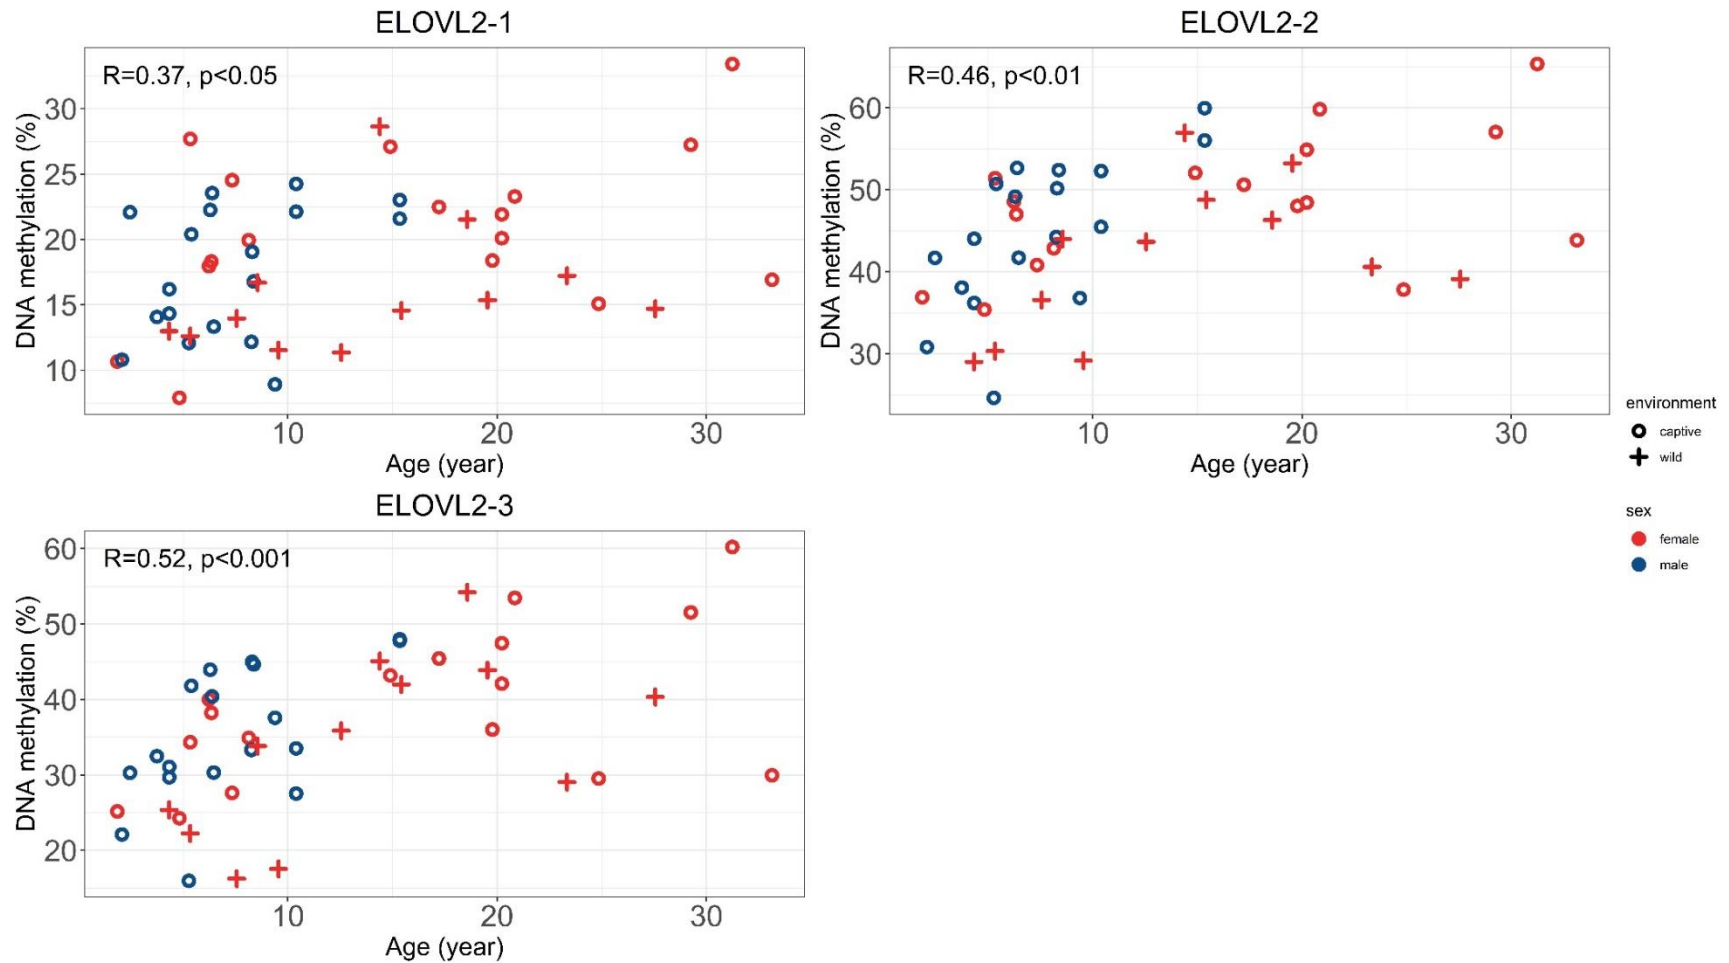

Supplementary Figure S\_R2\_3. Scatter plots of chronological age (year) versus DNA methylation level (%) at the CpG sites. This figure shows the CpGs adjacent to *ELOVL2*.

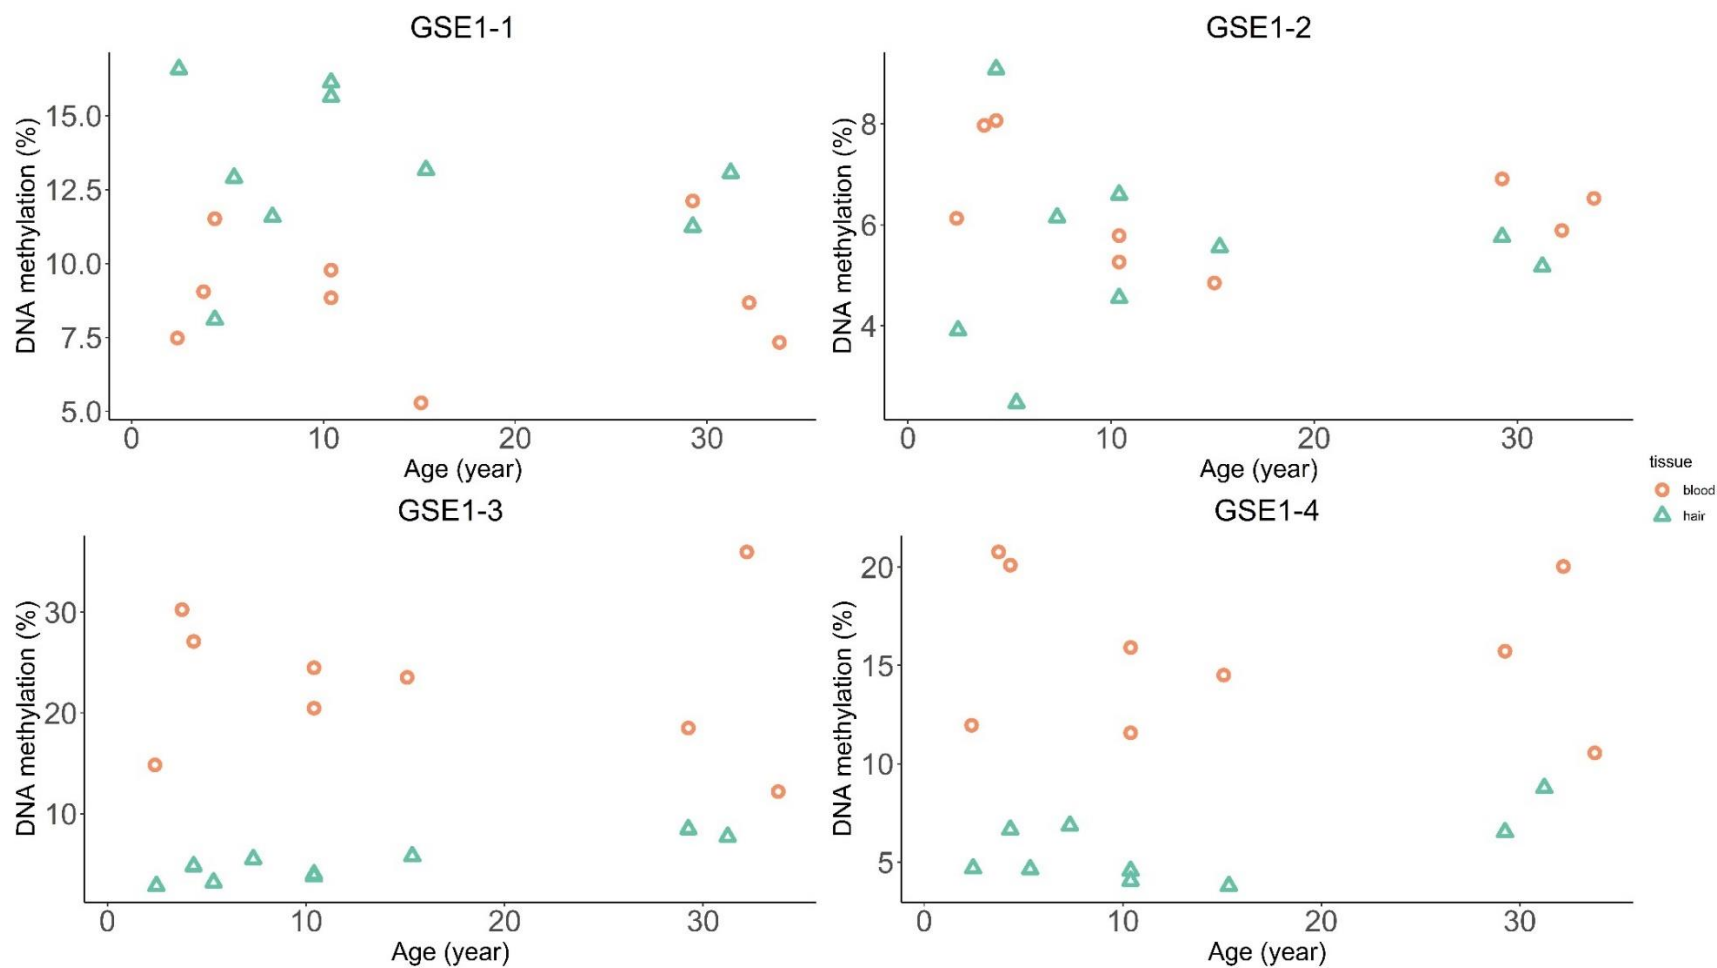

Supplementary Figure S\_R3\_1. Scatter plots of chronological age (year) versus DNA methylation level (%) at the CpG sites adjacent to *GSE1*, combining the results of both this hair study and a previous blood study (Nakamura et al., 2023).

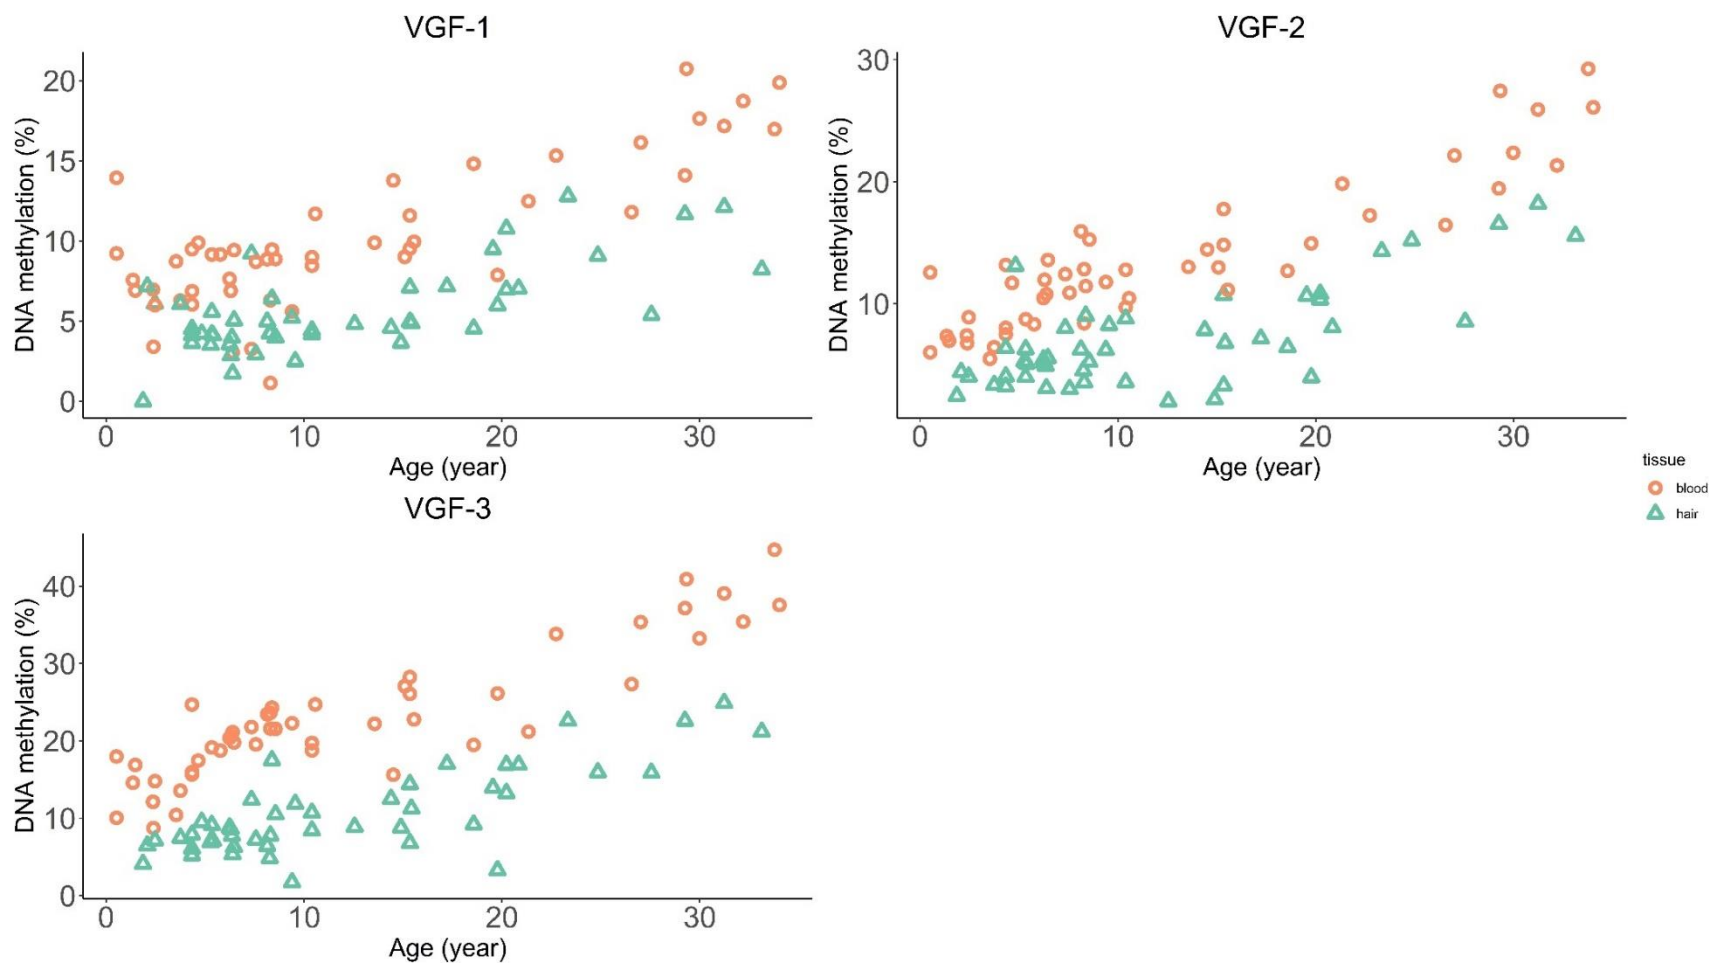

Supplementary Figure S\_R3\_2. Scatter plots of chronological age (year) versus DNA methylation level (%) at the CpG sites adjacent to *VGF*, combining the results of both this hair study and a previous blood study (Nakamura et al., 2023).

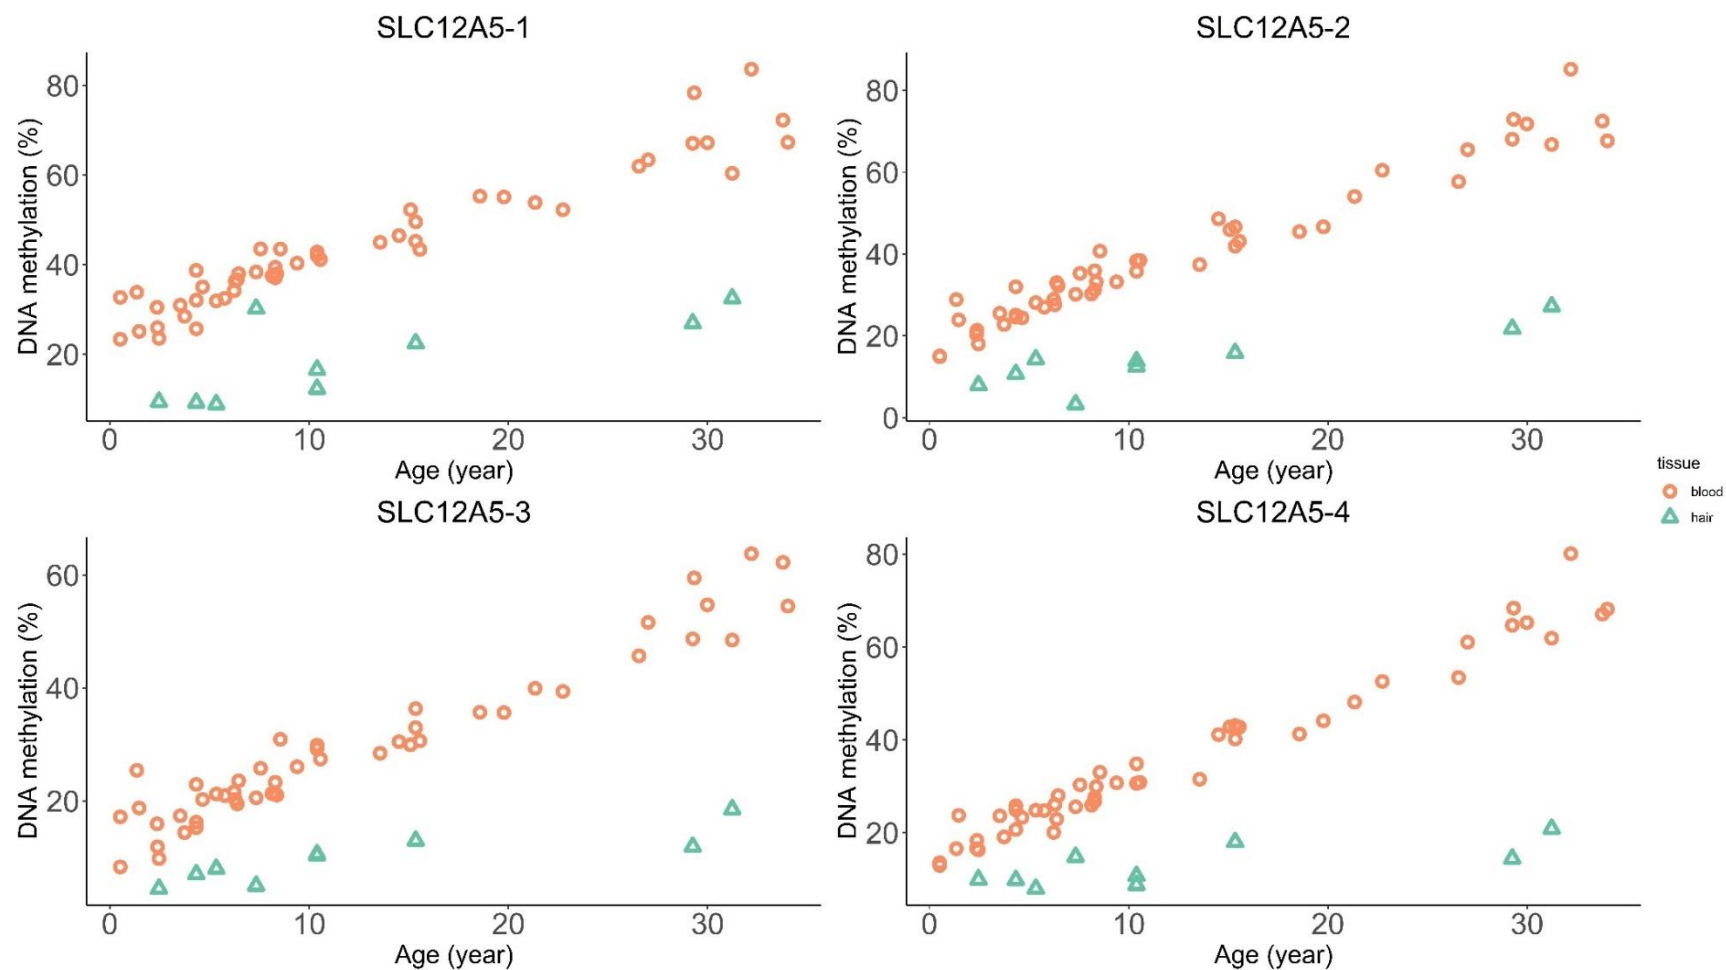

Supplementary Figure S\_R3\_3. Scatter plots of chronological age (year) versus DNA methylation level (%) at the CpG sites adjacent to *SLC12A5*, combining the results of both this hair study and a previous blood study (Nakamura et al., 2023).

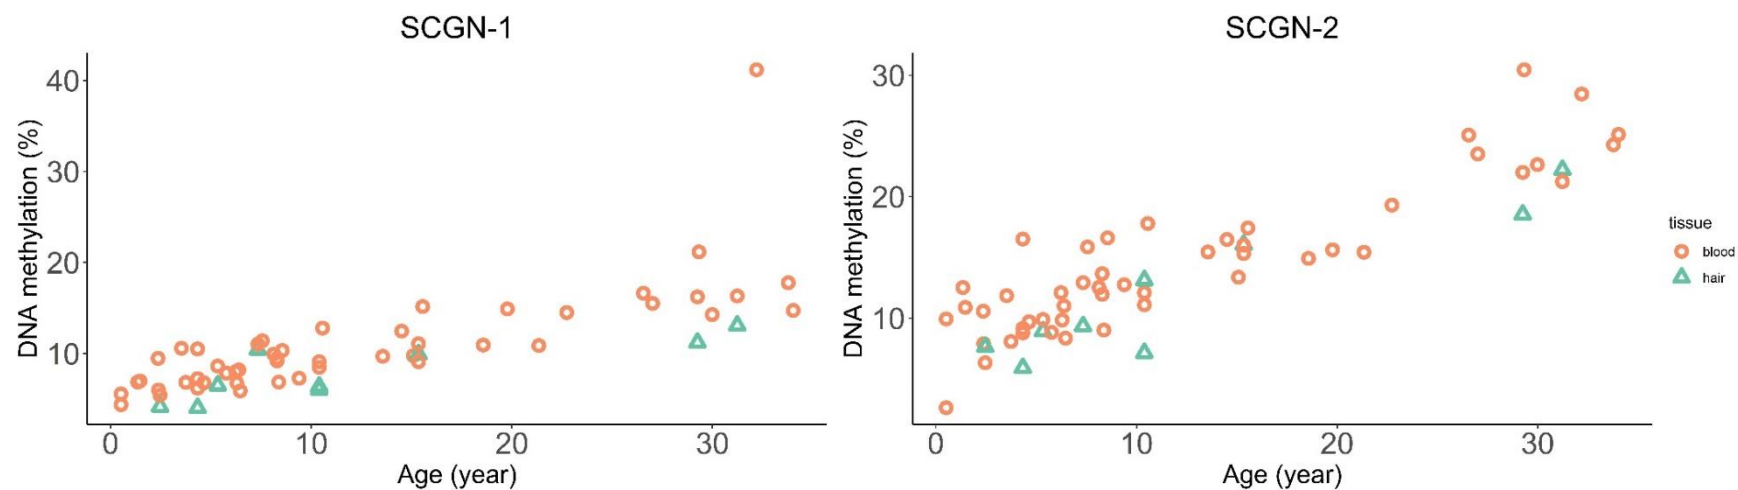

Supplementary Figure S\_R3\_4. Scatter plots of chronological age (year) versus DNA methylation level (%) at the CpG sites adjacent to *SCGN*, combining the results of both this hair study and a previous blood study (Nakamura et al., 2023).



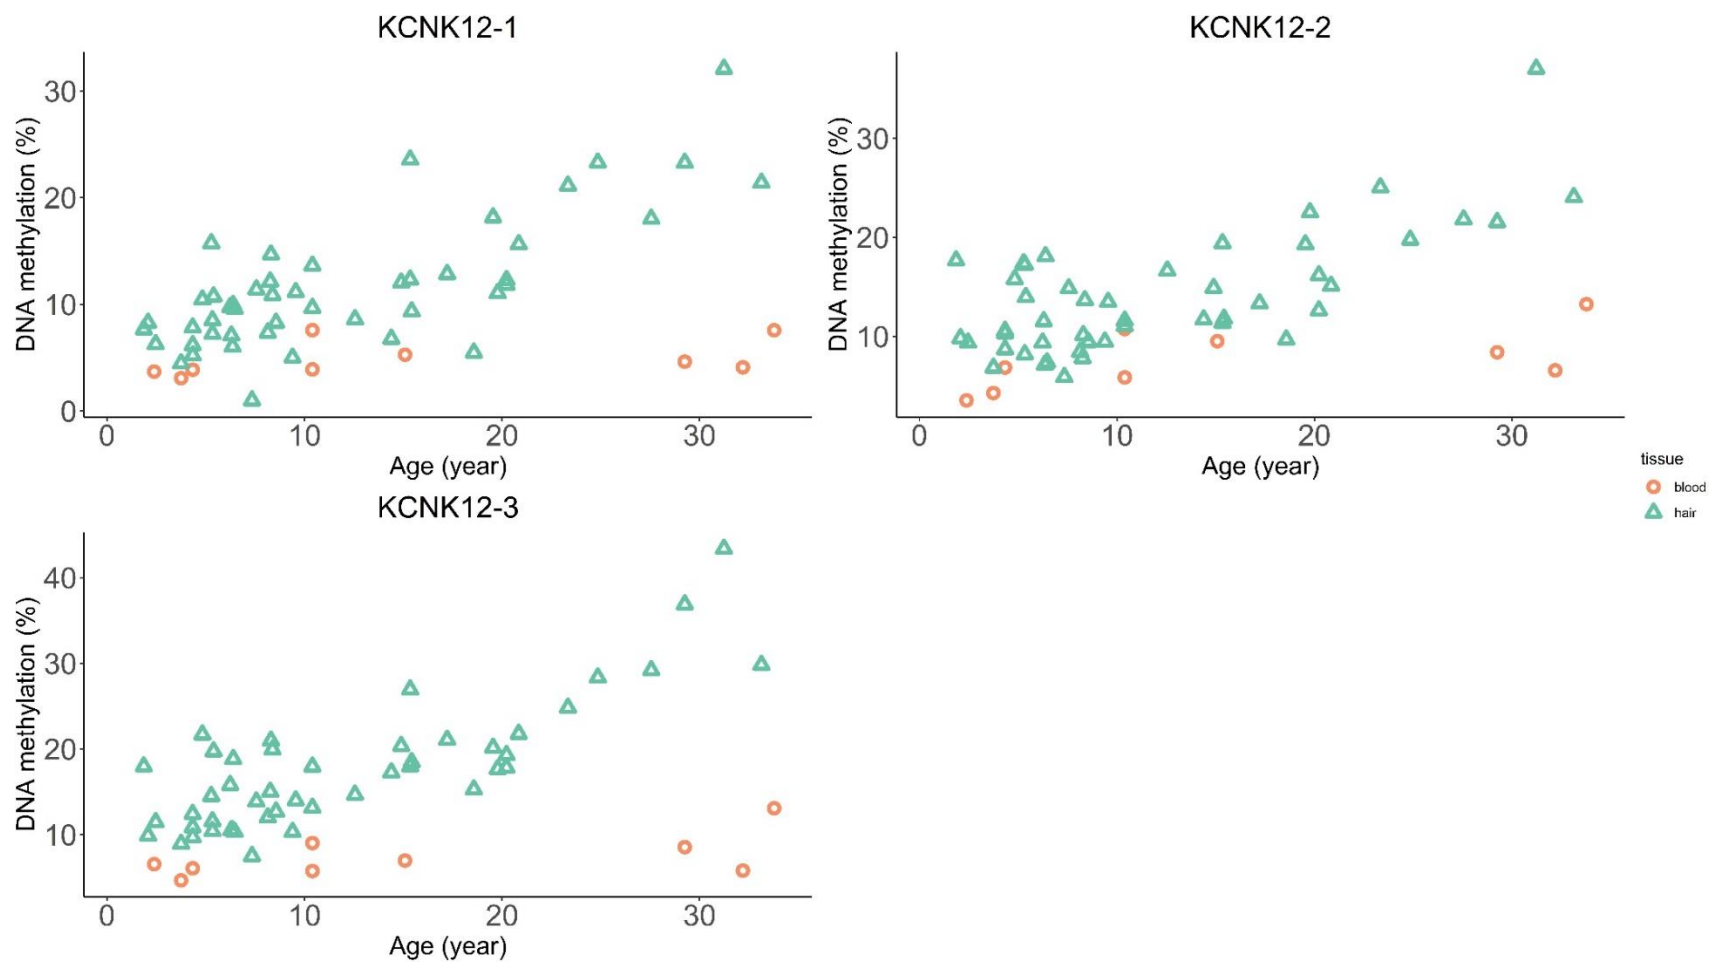

Supplementary Figure S\_R3\_5. Scatter plots of chronological age (year) versus DNA methylation level (%) at the CpG sites adjacent to *KCNK12*, combining the results of both this hair study and a previous blood study (Nakamura et al., 2023).

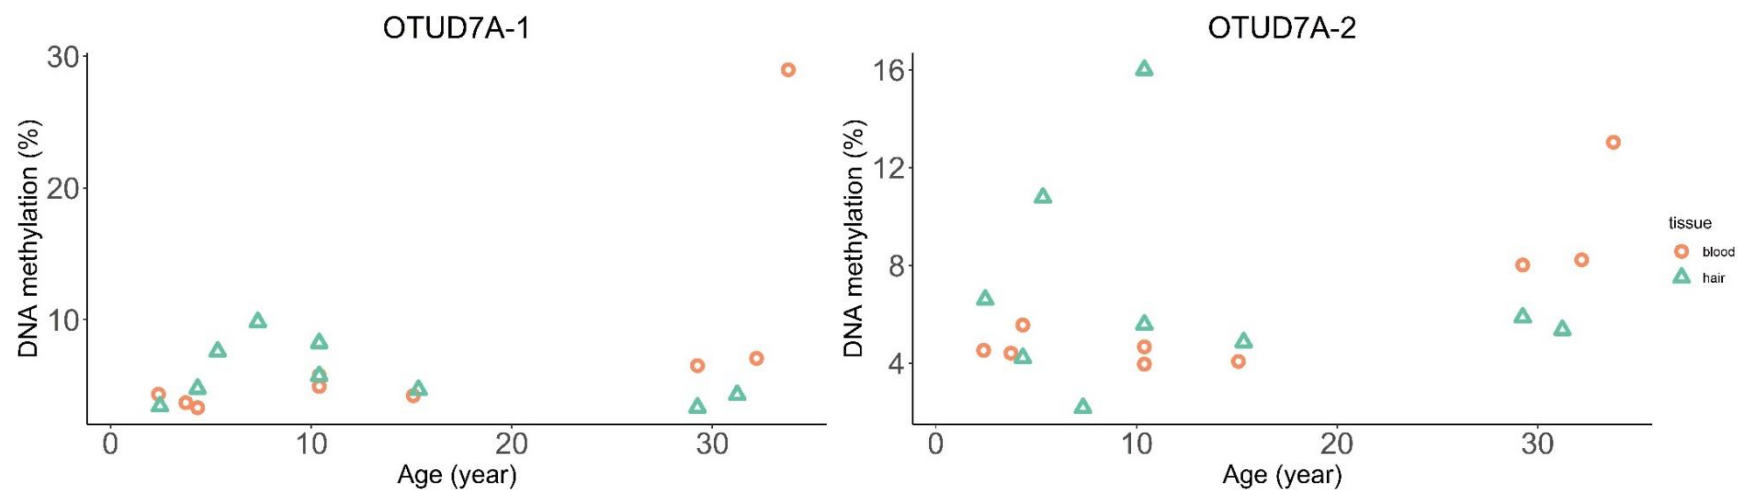

Supplementary Figure S\_R3\_6. Scatter plots of chronological age (year) versus DNA methylation level (%) at the CpG sites adjacent to *OTUD7A*, combining the results of both this hair study and a previous blood study (Nakamura et al., 2023).

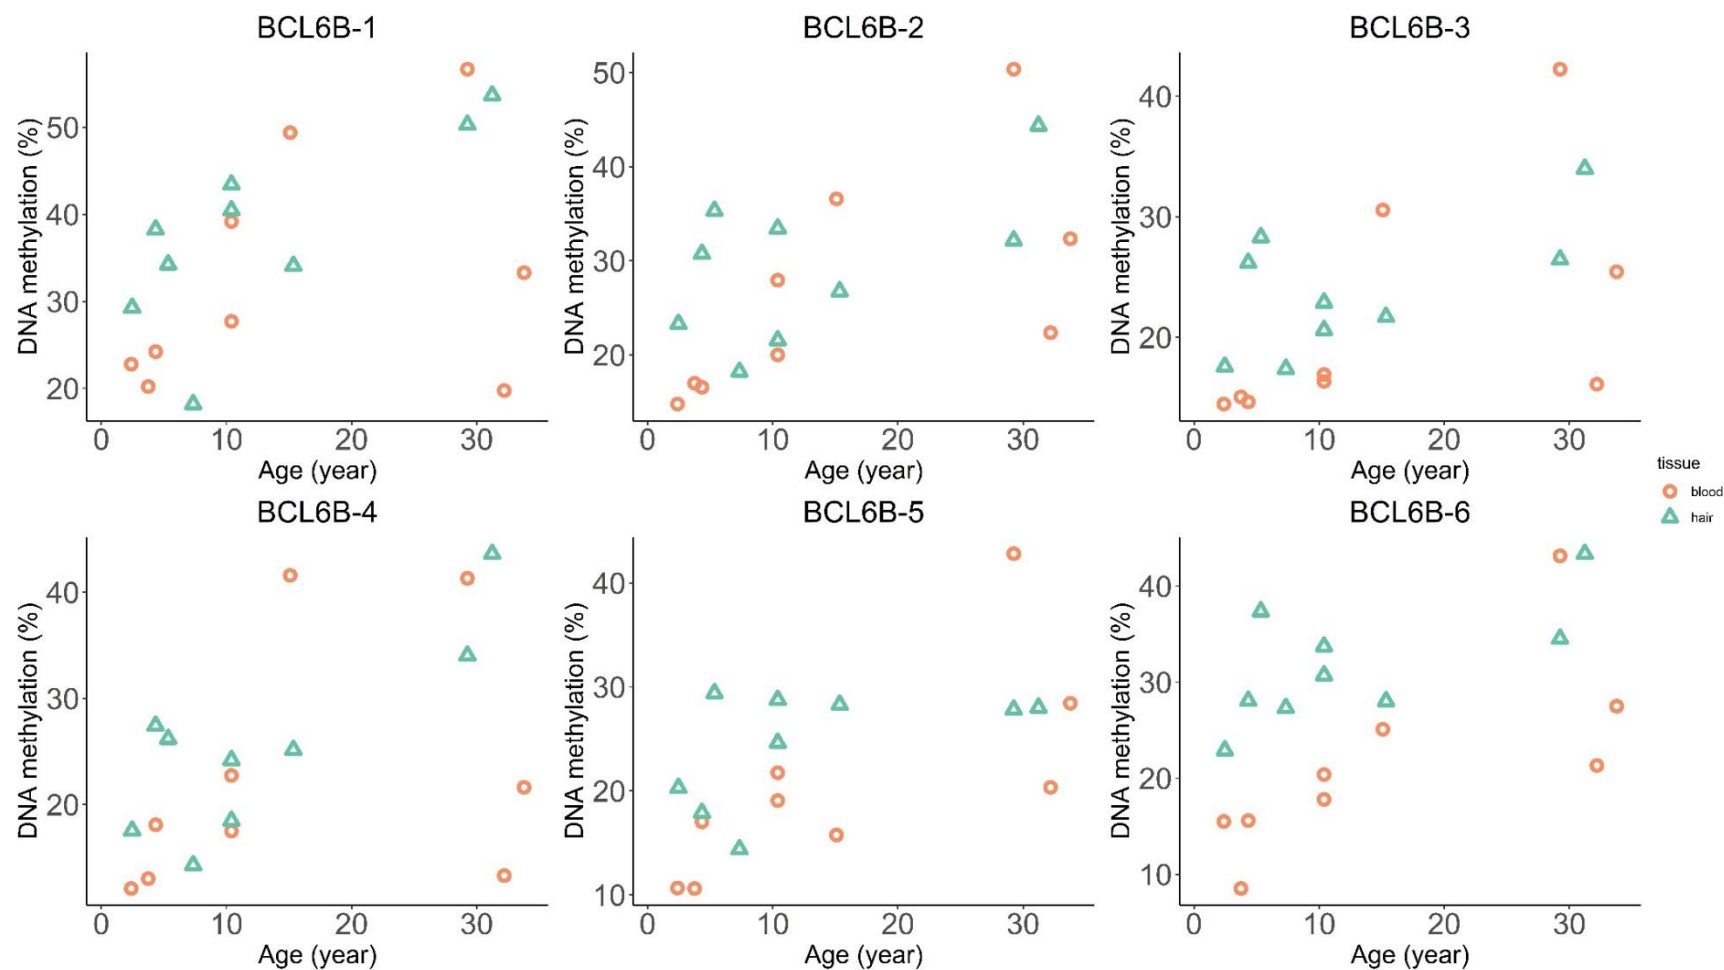

Supplementary Figure S\_R3\_7. Scatter plots of chronological age (year) versus DNA methylation level (%) at the CpG sites adjacent to *BCL6B*, combining the results of both this hair study and a previous blood study (Nakamura et al., 2023).

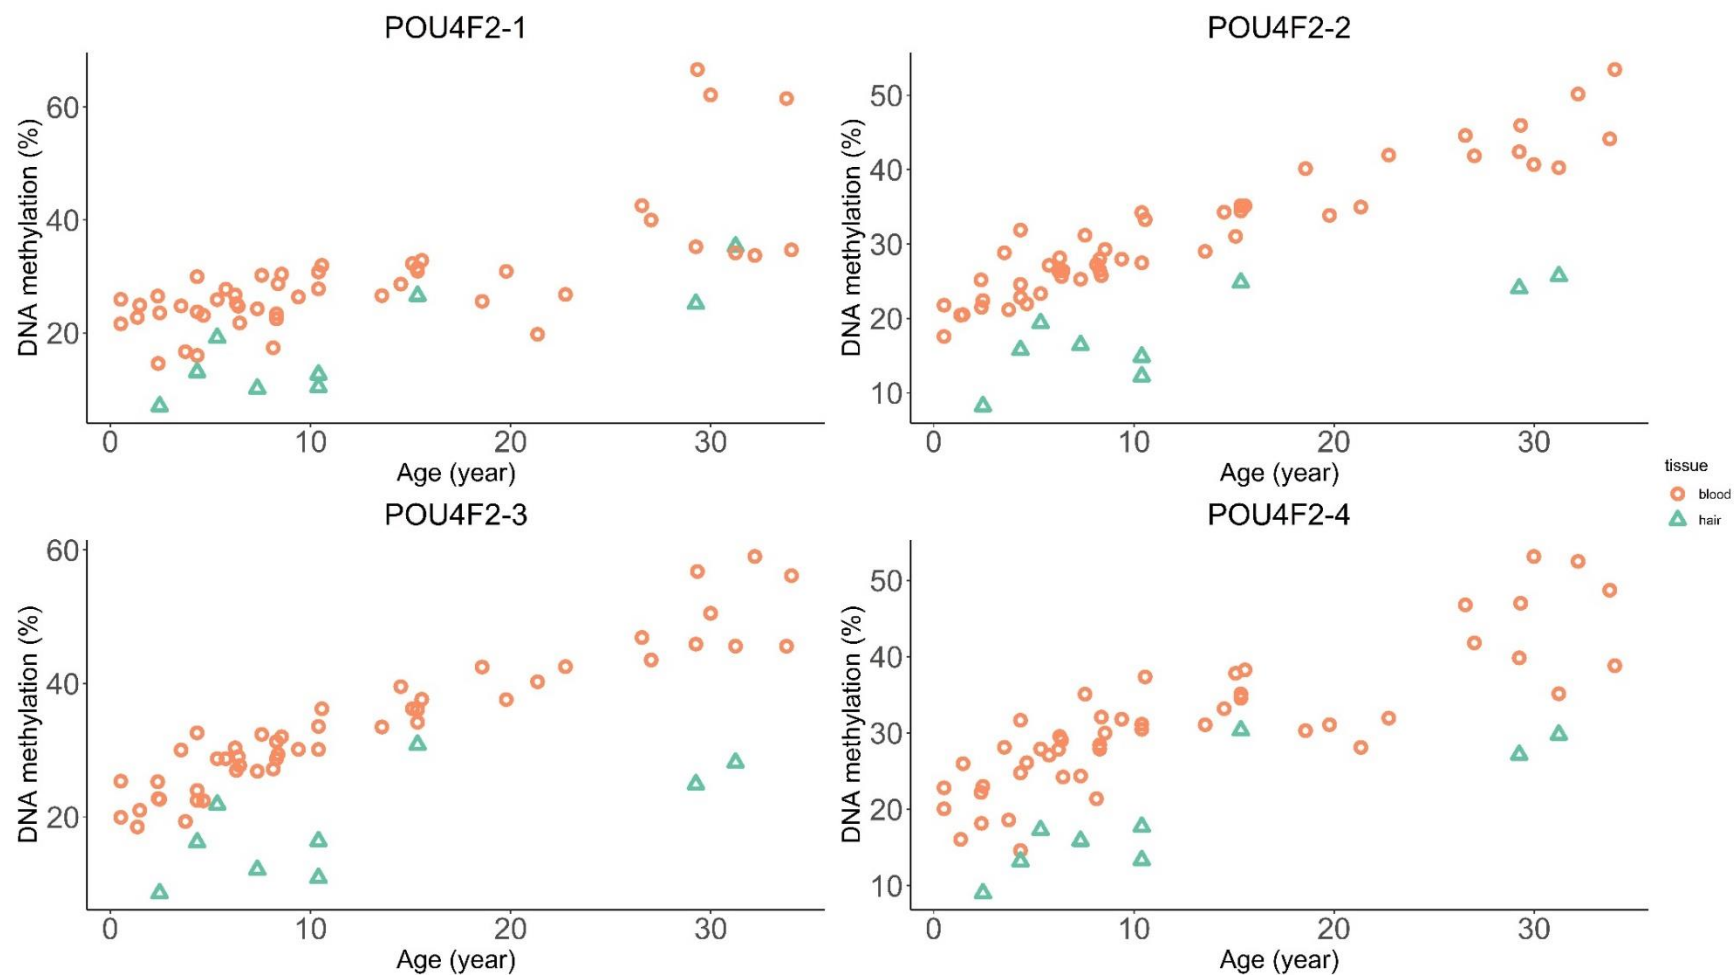

Supplementary Figure S\_R3\_8. Scatter plots of chronological age (year) versus DNA methylation level (%) at the CpG sites adjacent to *POU4F2*, combining the results of both this hair study and a previous blood study (Nakamura et al., 2023).

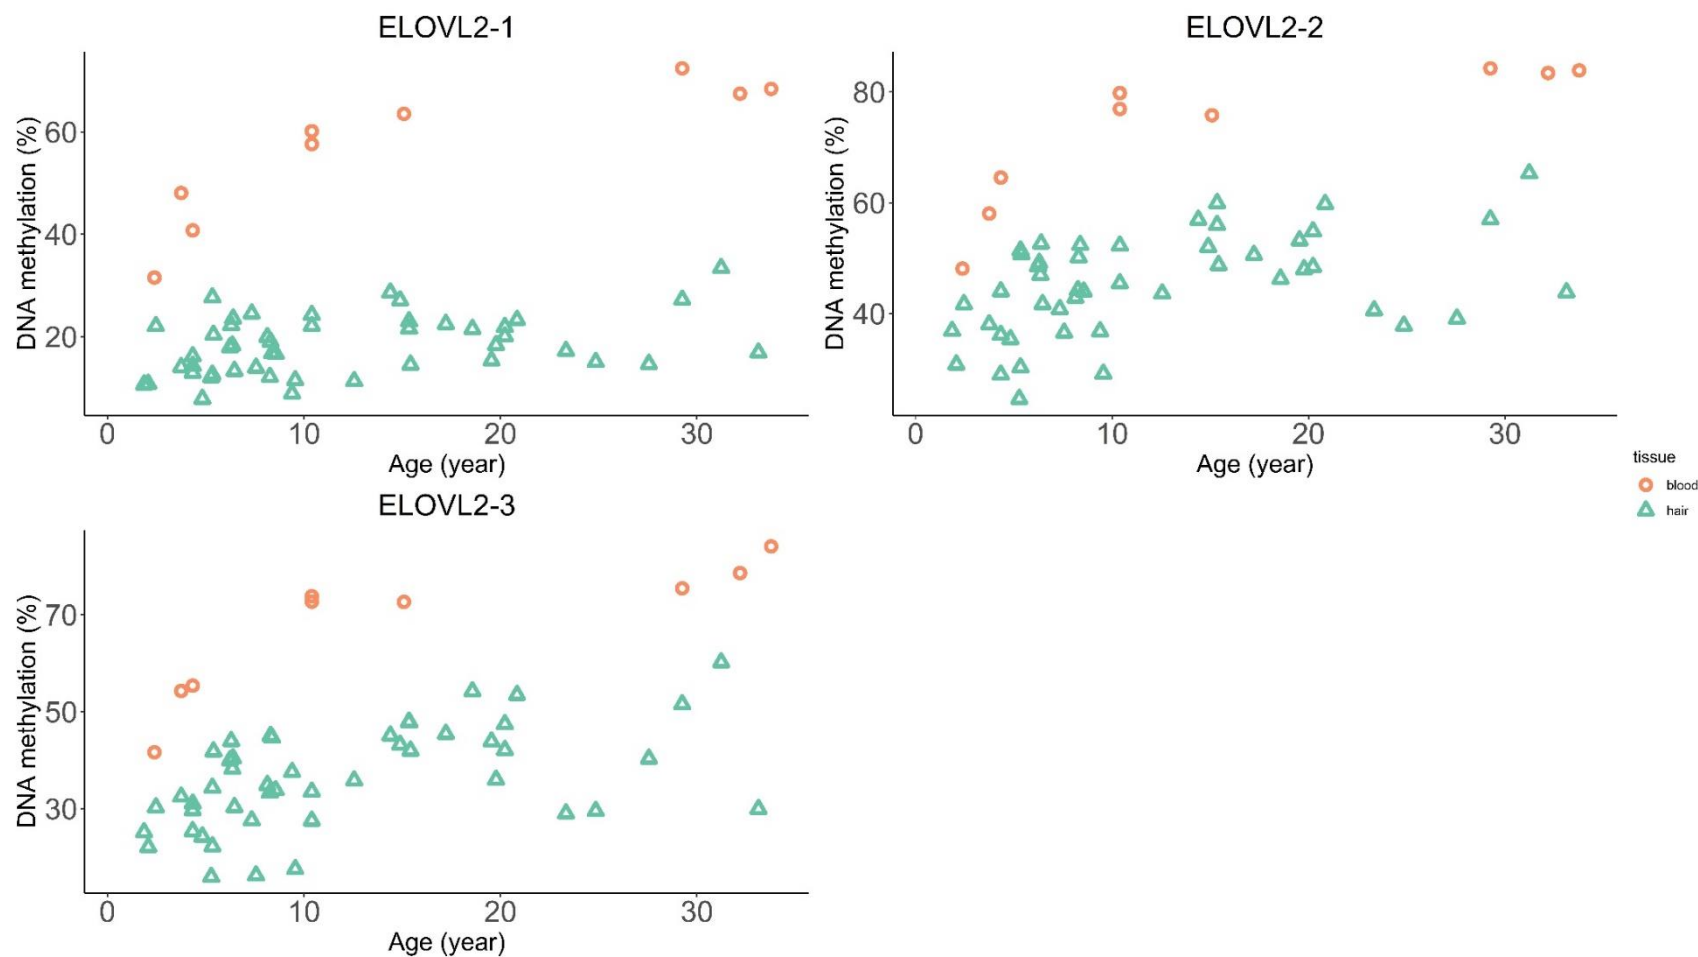

Supplementary Figure S\_R3\_9. Scatter plots of chronological age (year) versus DNA methylation level (%) at the CpG sites adjacent to *ELOVL2*, combining the results of both this hair study and a previous blood study (Nakamura et al., 2023).

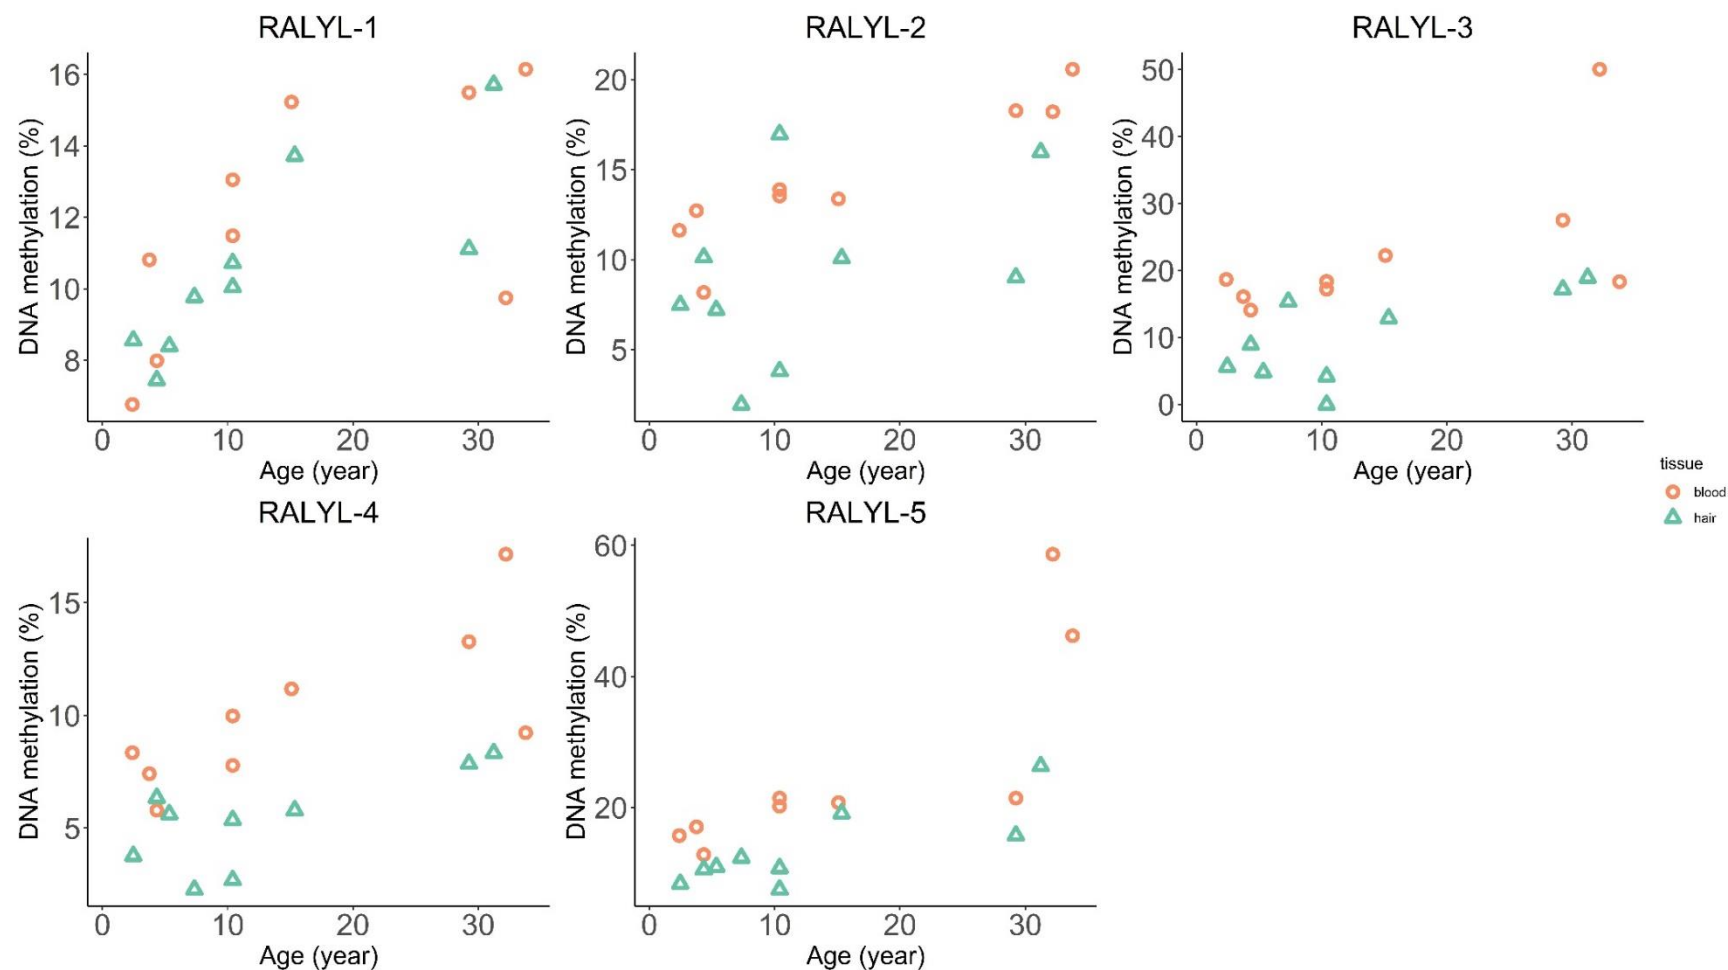

Supplementary Figure S\_R3\_10. Scatter plots of chronological age (year) versus DNA methylation level (%) at the CpG sites adjacent to *RALYL*, combining the results of both this hair study and a previous blood study (Nakamura et al., 2023).

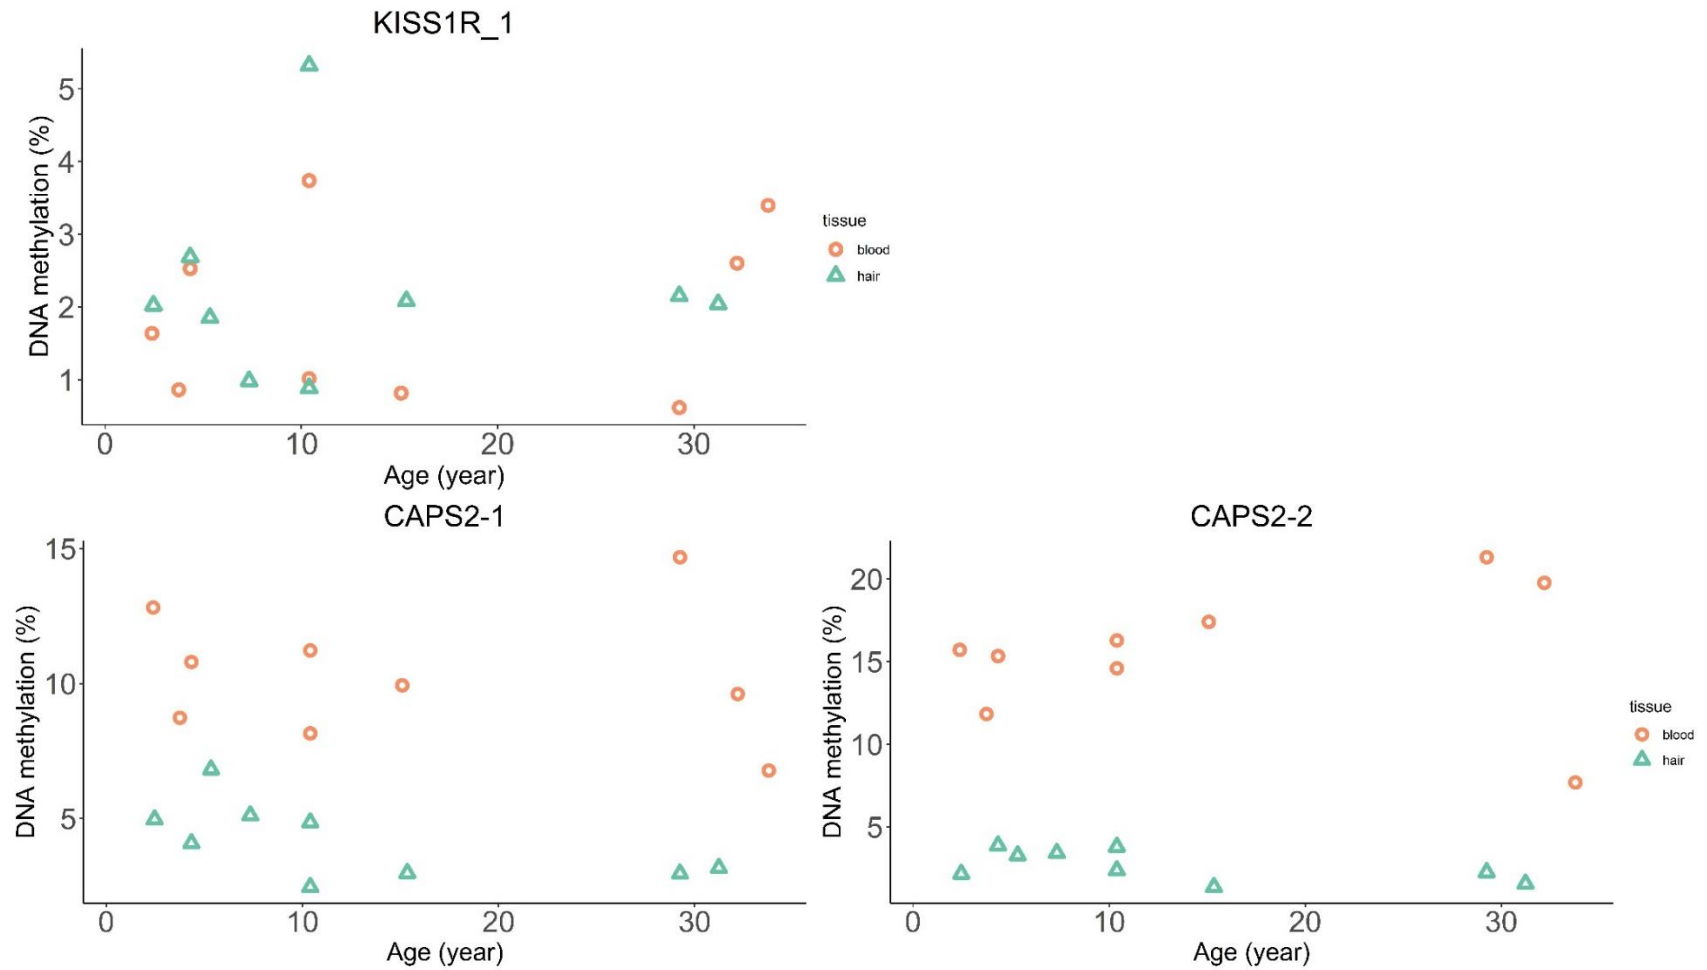

Supplementary Figure S\_R3\_11. Scatter plots of chronological age (year) versus DNA methylation level (%) at the CpG sites adjacent to *KISS1R* and *CAPS2*, combining the results of both this hair study and a previous blood study (Nakamura et al., 2023).
